# Supplementary material for: Effect of substituents on the 1O2 production and biological activity of (N^N^N)Pt(py) complexes
Source: Royal Society of Chemistry journal article supplement (doi:10.1039/d3dt04050j), 2023-12-18
Supplement: d3dt04050j1.pdf [file d3dt04050j1.pdf]

## Effect of the substituents on the $^1\text{O}_2$ production and biological activity of $(\text{N}^{\wedge}\text{N}^{\wedge}\text{N})\text{Pt}(\text{py})$ complexes.

Guillermo Romo-Islas,<sup>a,b</sup> María Gil-Moles,<sup>c,d</sup> Arnav Saxena,<sup>a</sup> Antonio Frontera,<sup>e</sup>  
M. Concepción Gimeno<sup>c,\*</sup> and Laura Rodríguez<sup>a,b,\*</sup>

<sup>a</sup> *Departament de Química Inorgànica i Orgànica, Secció de Química Inorgànica, Universitat de Barcelona, Martí i Franquès 1-11, 08028 Barcelona, Spain. e-mail: laurarodriguezr@ub.edu*

<sup>b</sup> *Institut de Nanociència i Nanotecnologia (IN2UB). Universitat de Barcelona, 08028 Barcelona, Spain*

<sup>c</sup> *Instituto de Síntesis Química y Catálisis Homogénea (ISQCH), CSIC-Universidad de Zaragoza, Pedro Cerbuna 12, 50009 Zaragoza, Spain. e-mail: gimeno@unizar.es*

<sup>d</sup> *Departamento de Química, Centro de Investigación de Síntesis Química (CISQ), Universidad de la Rioja. Complejo Científico-Tecnológico, 26004, Logroño (Spain)*

<sup>e</sup> *Departament de Química, Universitat de les Illes Balears, 07122 Palma de Mallorca,*

## Supporting Information

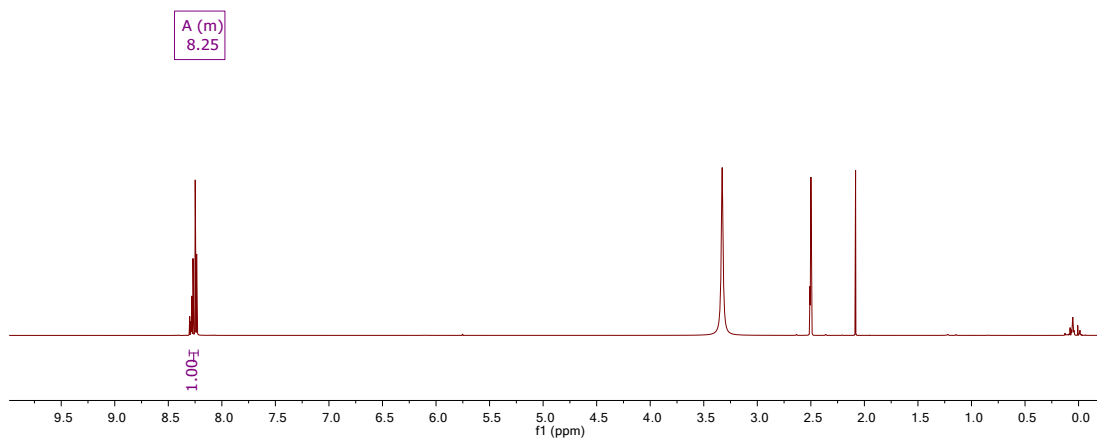

**Figure S1.**  $^1\text{H}$  NMR spectrum of ligand  $\text{H}_2\text{L}^3$  in  $\text{DMSO}-d^6$ .

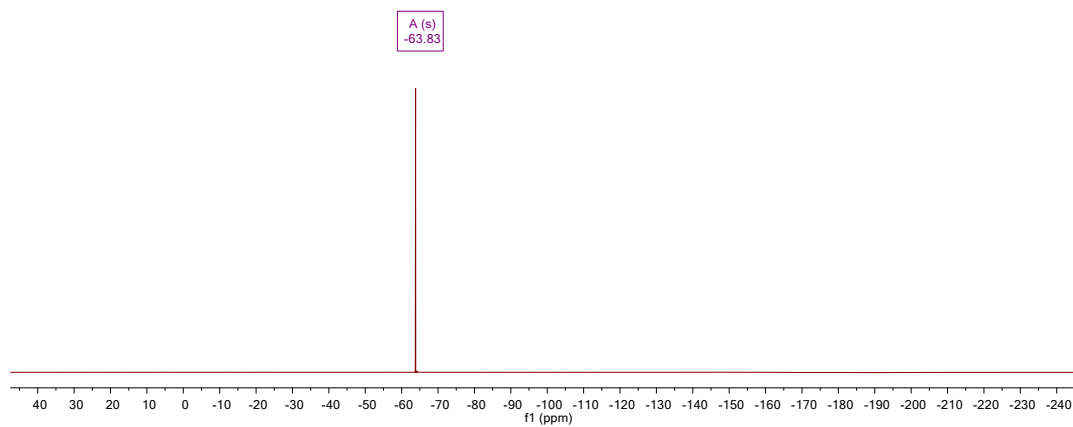

**Figure S2.**  $^{19}\text{F}$  NMR spectrum of complex  $\text{H}_2\text{L}^3$  in  $\text{DMSO}-d^6$ .

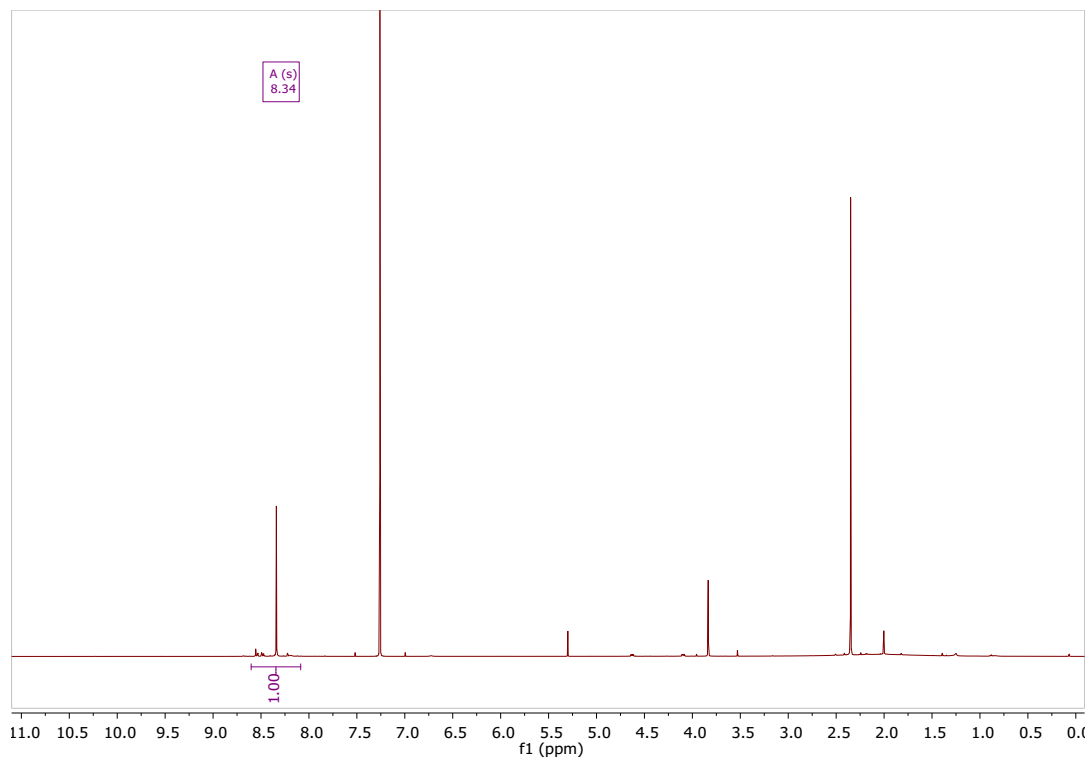

**Figure S3.**  $^1\text{H}$  NMR spectrum of ligand  $\text{H}_2\text{L}^4$  in  $\text{CDCl}_3$ .

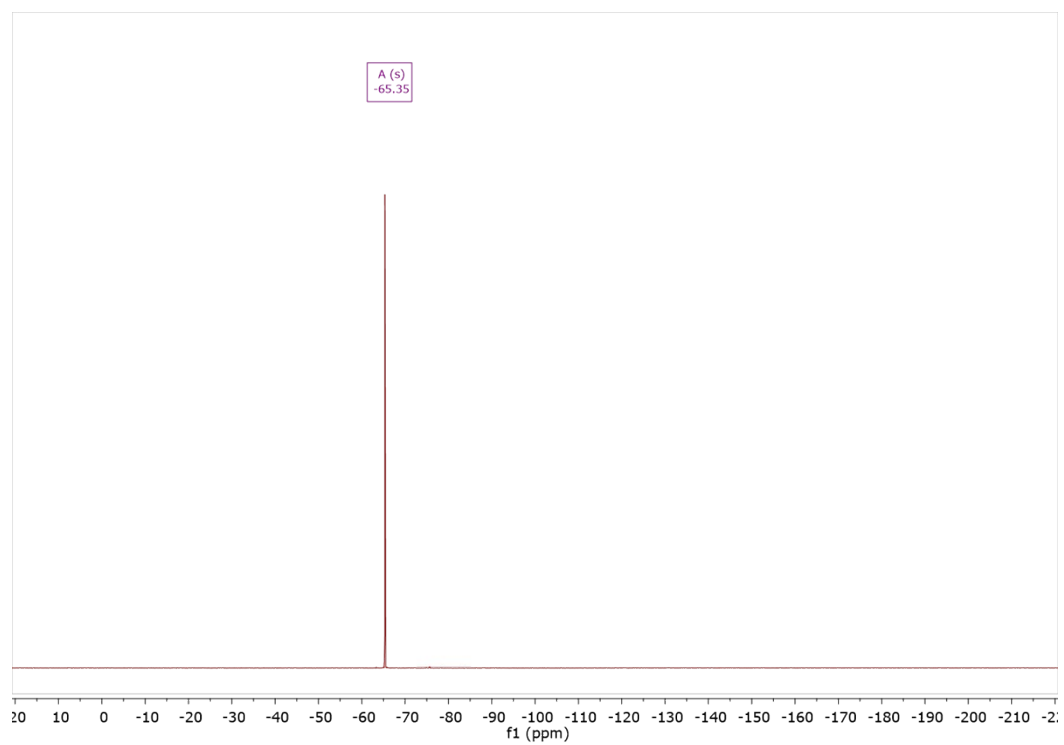

**Figure S4.**  $^{19}\text{F}$  NMR spectrum of complex  $\text{H}_2\text{L}^4$  in  $\text{CDCl}_3$ .

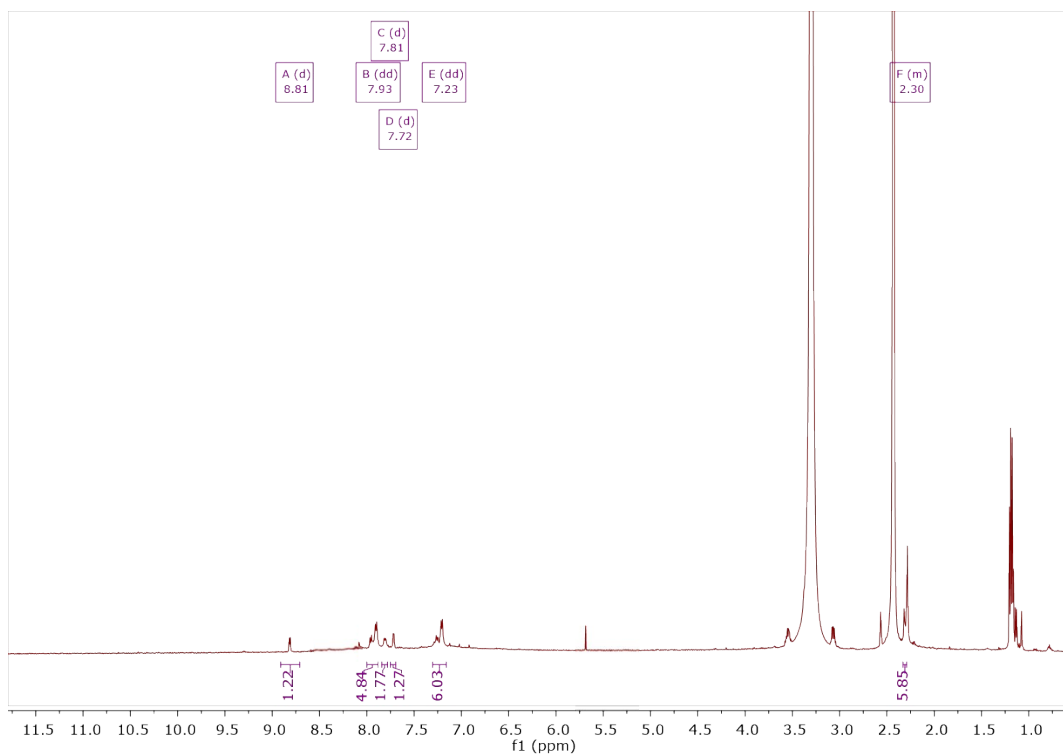

**Figure S5.** <sup>1</sup>H NMR spectrum of complex 1-CF<sub>3</sub> in DMSO-d<sub>6</sub>.

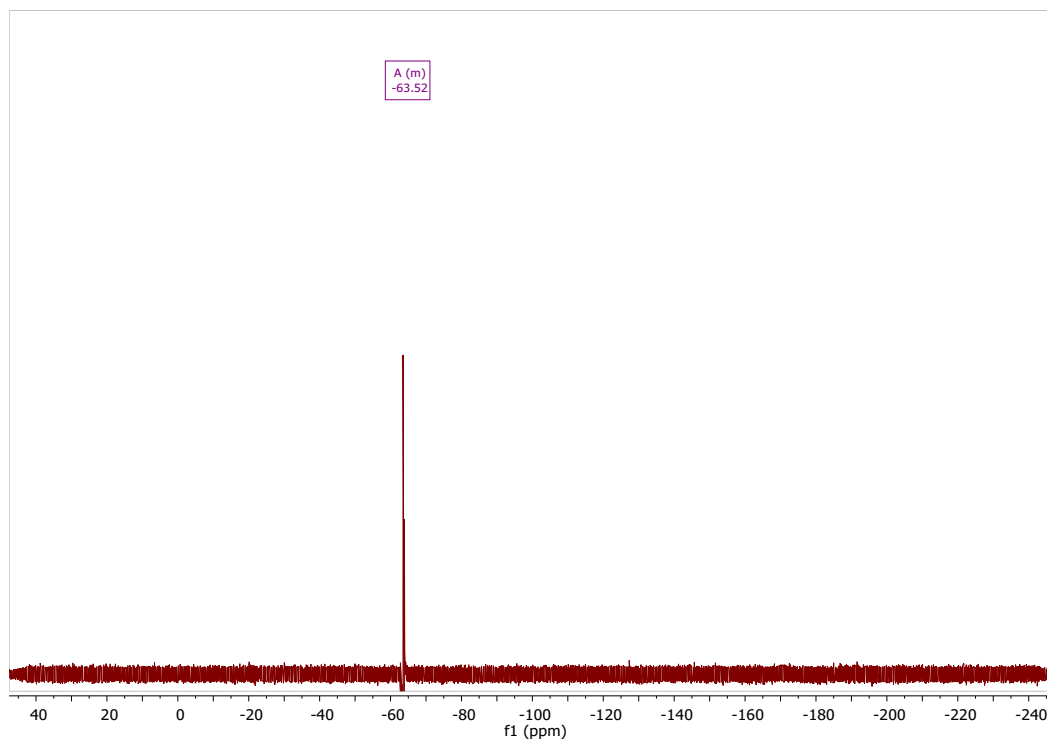

**Figure S6.** <sup>19</sup>F NMR spectrum of complex 1-CF<sub>3</sub> in DMSO-d<sub>6</sub>.

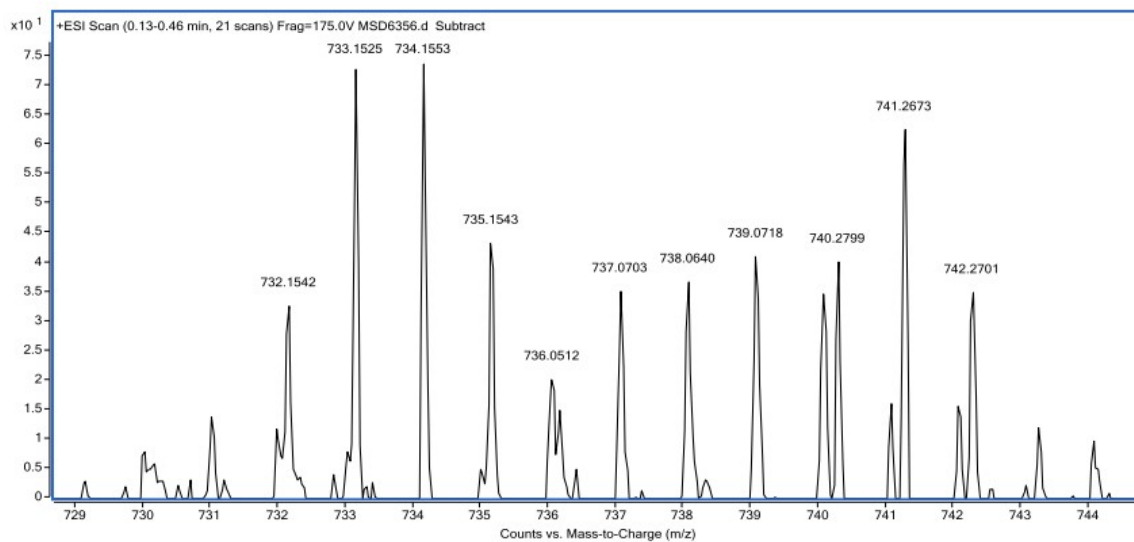

**Figure S7.** ESI-TOF(+) of complex **1-CF<sub>3</sub>**.

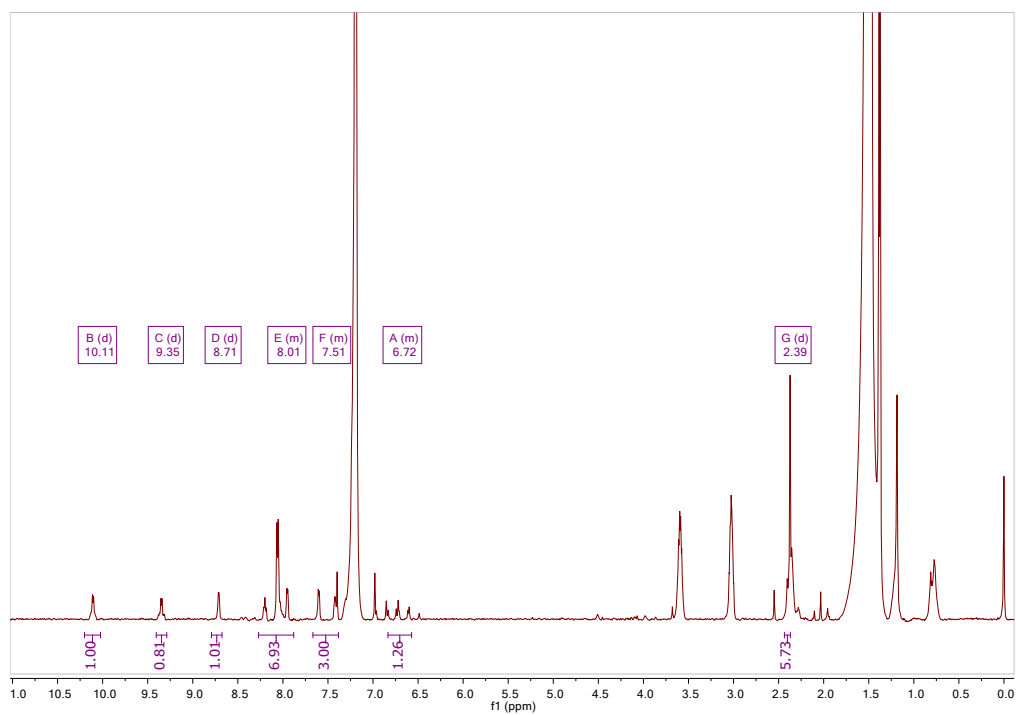

**Figure S8.** <sup>1</sup>H NMR spectrum of complex **1-CHF<sub>2</sub>** in CDCl<sub>3</sub>.

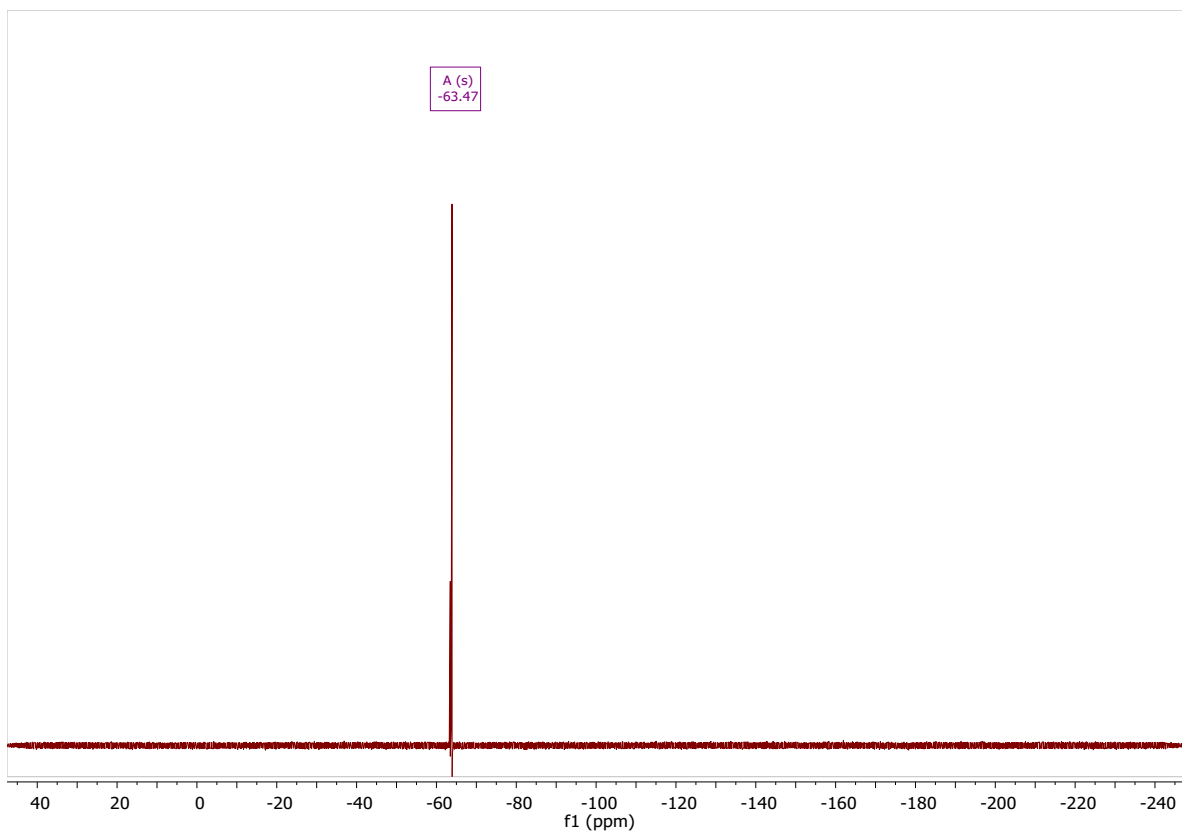

**Figure S9.**  $^{19}\text{F}$  NMR spectrum of complex **1-CHF<sub>2</sub>** in  $\text{CDCl}_3$ .

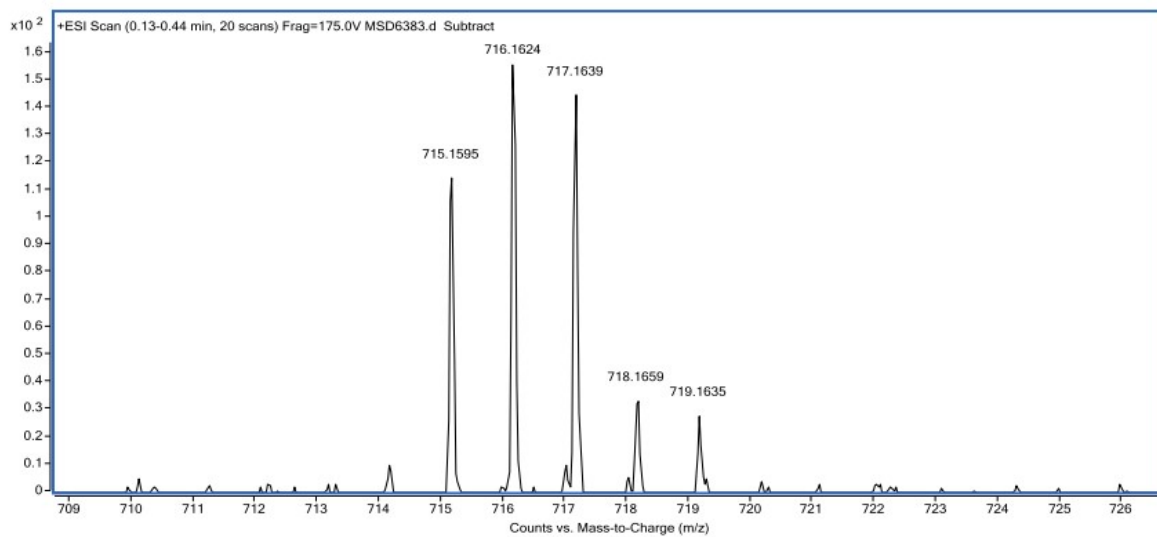

**Figure S10.** ESI-TOF(+) of complex **1-CHF<sub>2</sub>**.

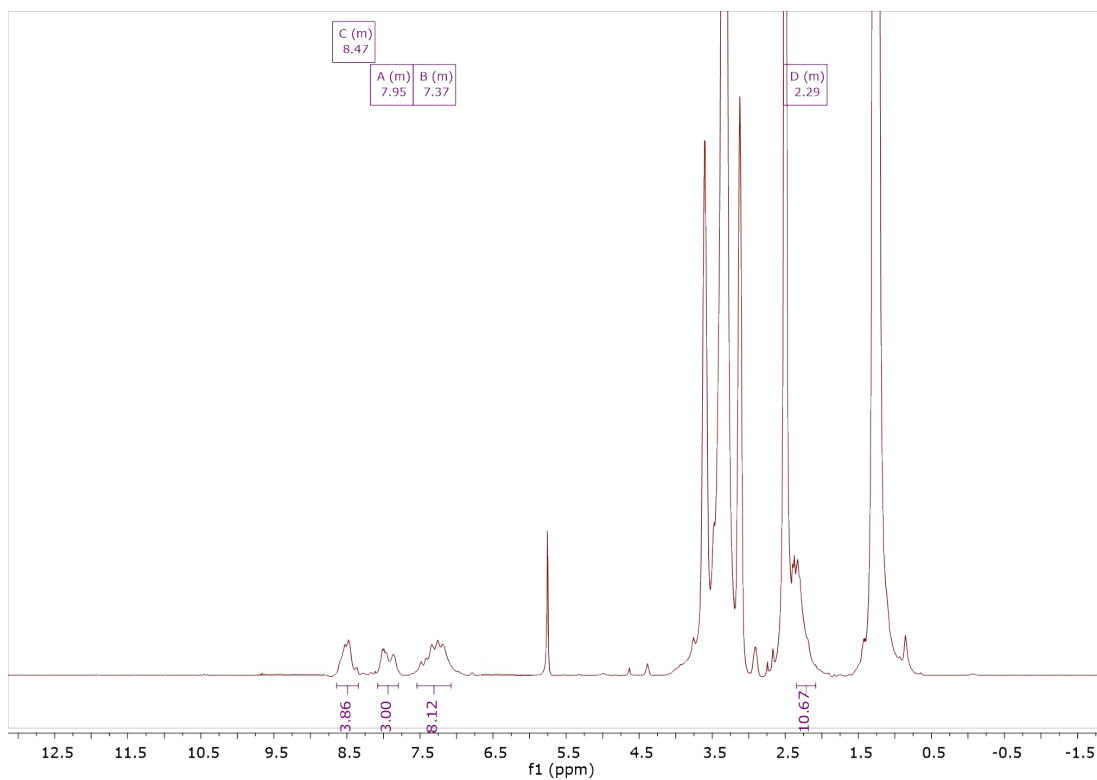

**Figure S11.**  $^1\text{H}$  NMR spectrum of complex **1-CH<sub>3</sub>** in  $\text{DMSO-}d^6$ .

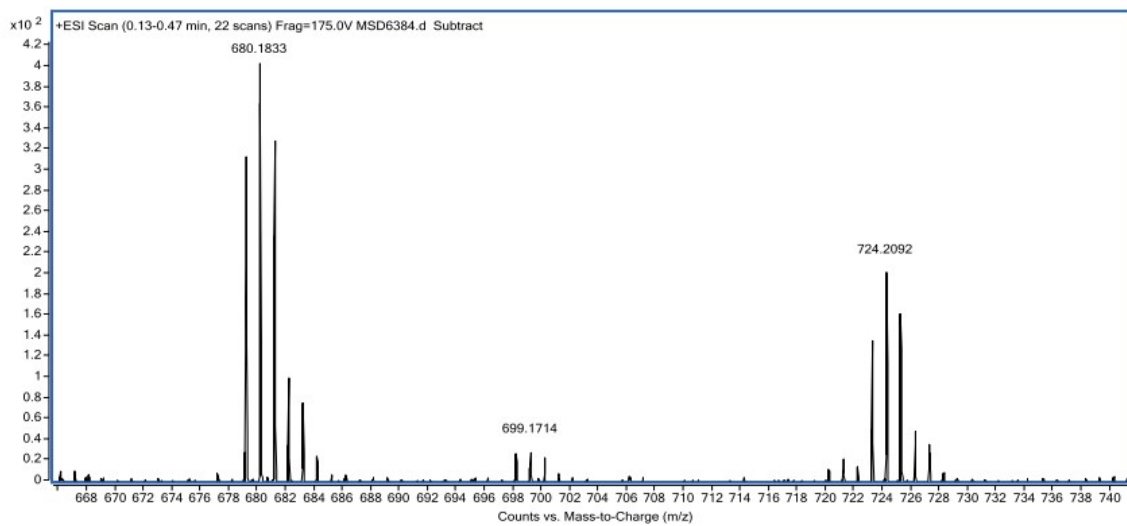

**Figure S12.** ESI-TOF(+) of complex **1-CH<sub>3</sub>**.

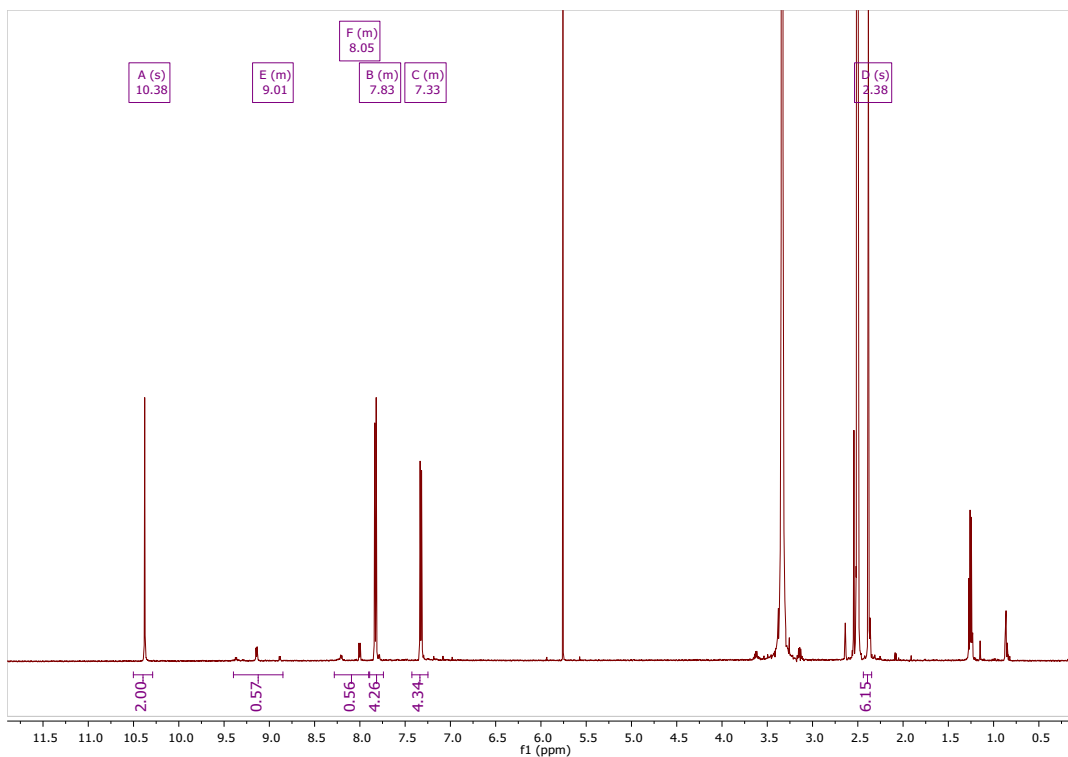

**Figure S13.**  $^1\text{H}$  NMR spectrum of complex  $2\text{-CF}_3$  in  $\text{DMSO-}d^6$ .

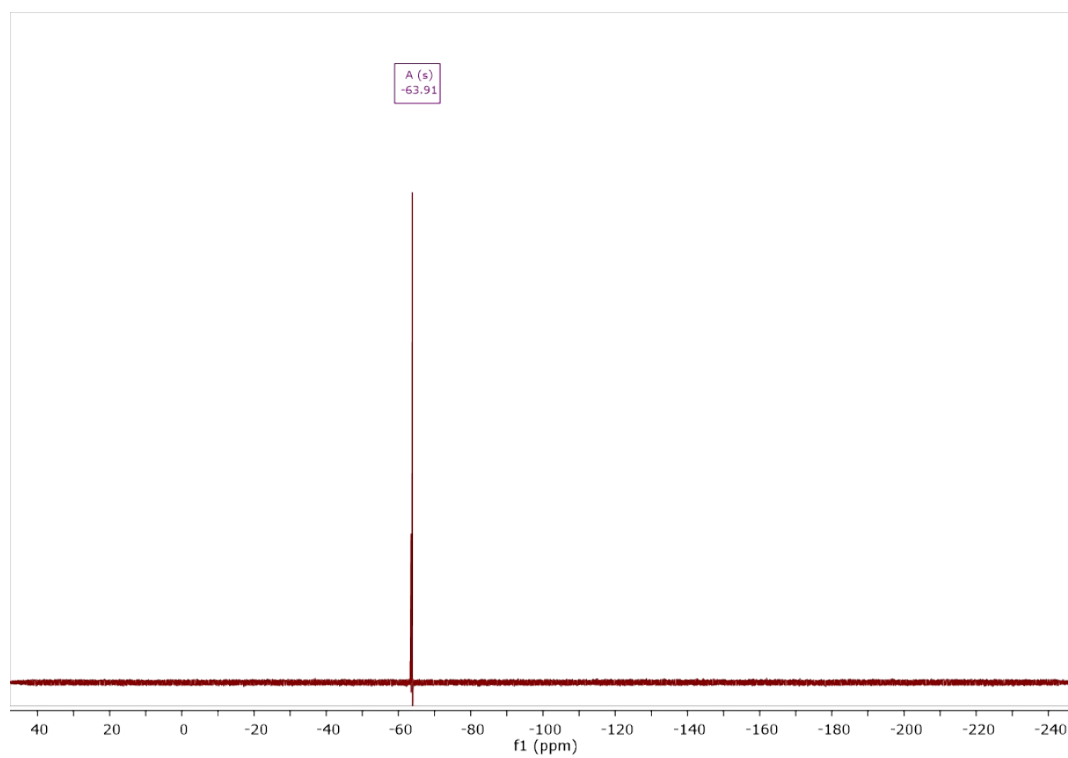

**Figure S14.**  $^{19}\text{F}$  NMR spectrum of complex  $2\text{-CF}_3$  in  $\text{DMSO-}d^6$ .



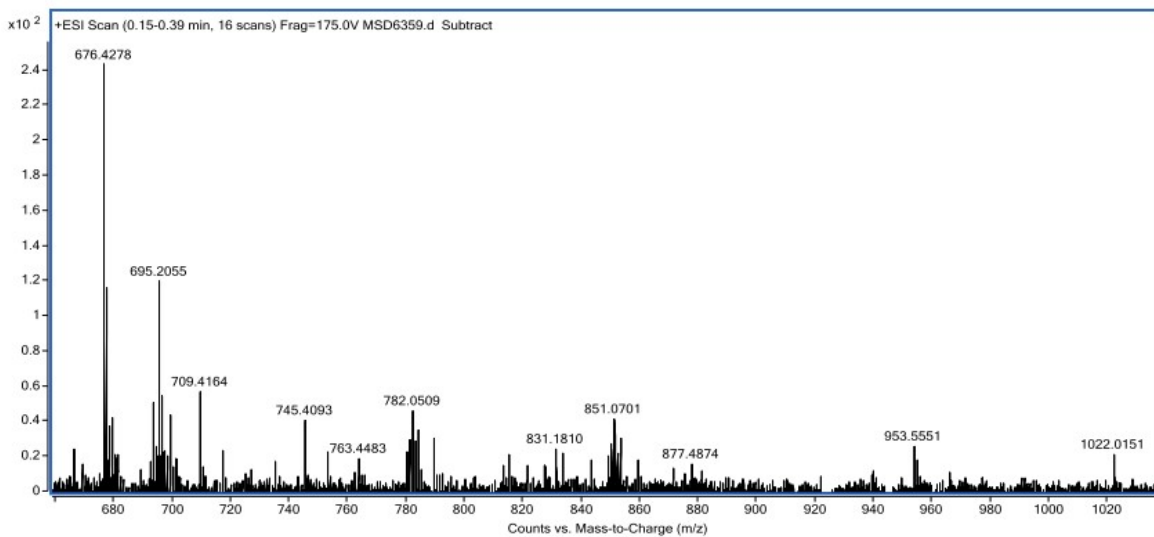

**Figure S15.** ESI-TOF(+) of complex **2-CF<sub>3</sub>**.

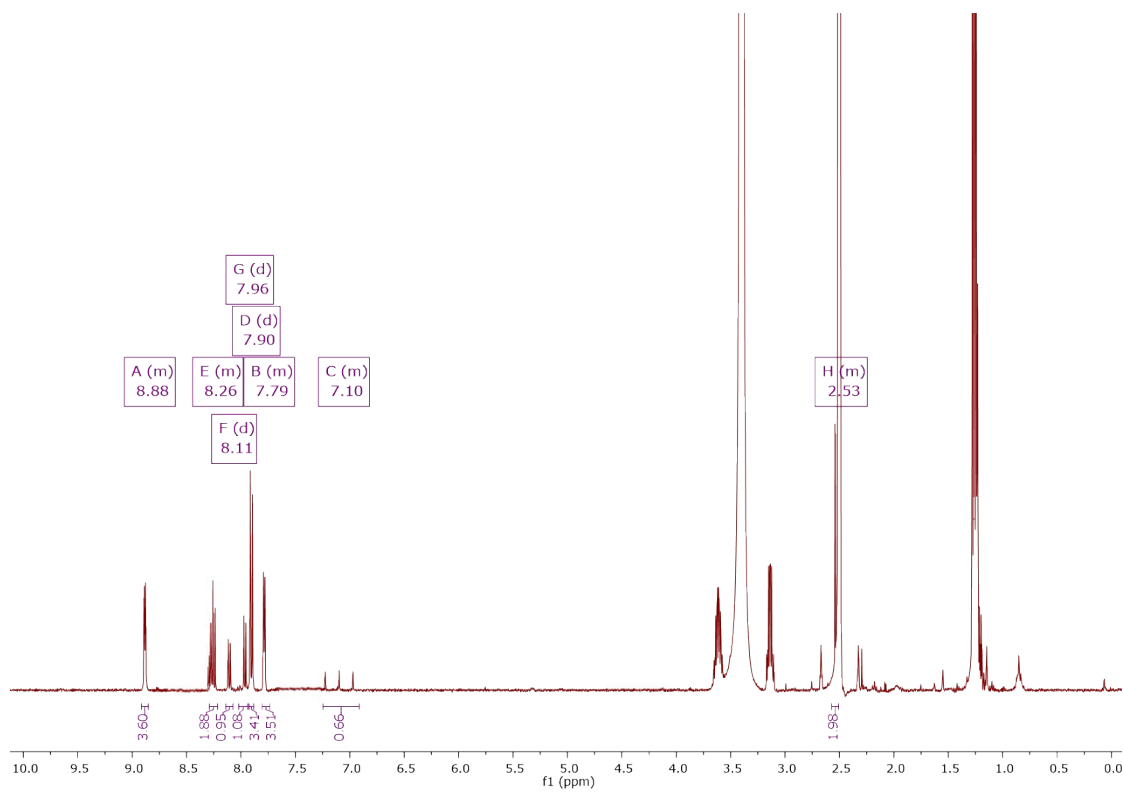

**Figure S16.** <sup>1</sup>H NMR spectrum of complex **2-CHF<sub>2</sub>** in DMSO-*d*<sup>6</sup>.

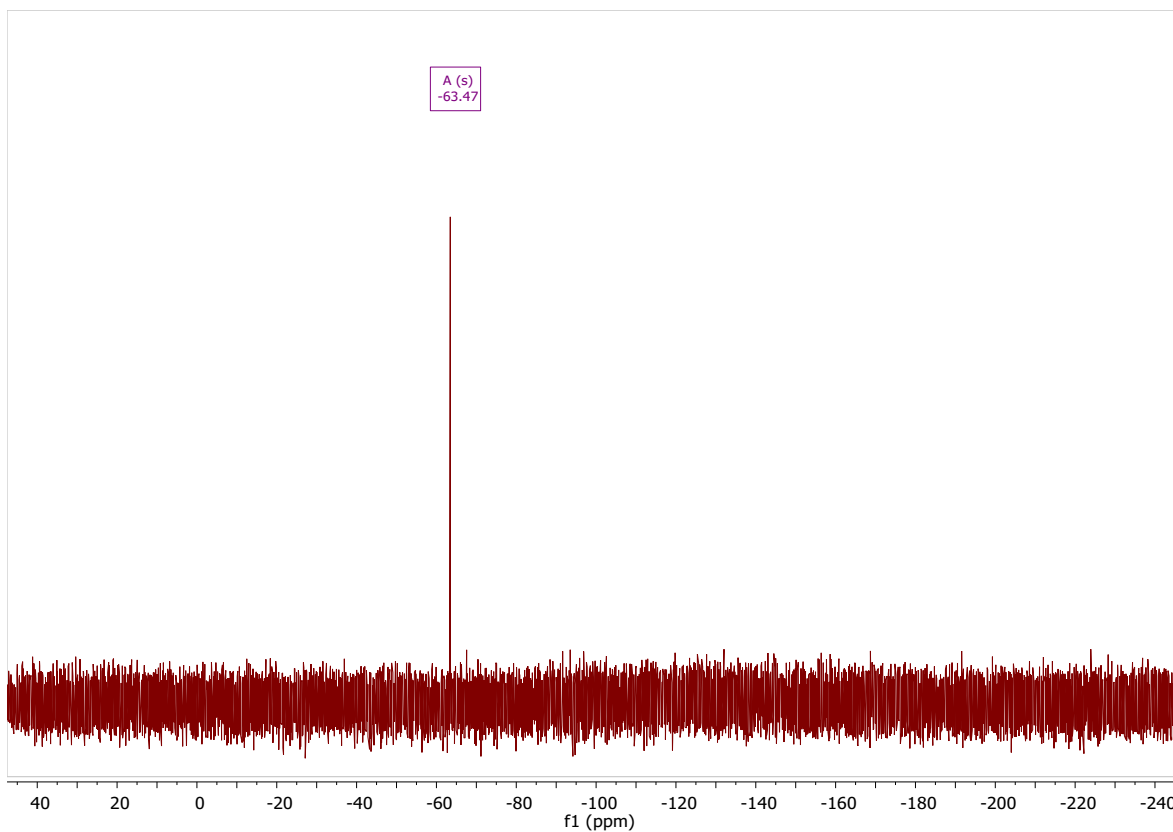

**Figure S17.**  $^{19}\text{F}$  NMR spectrum of complex  $2\text{-CHF}_2$  in  $\text{DMSO-}d_6$ .

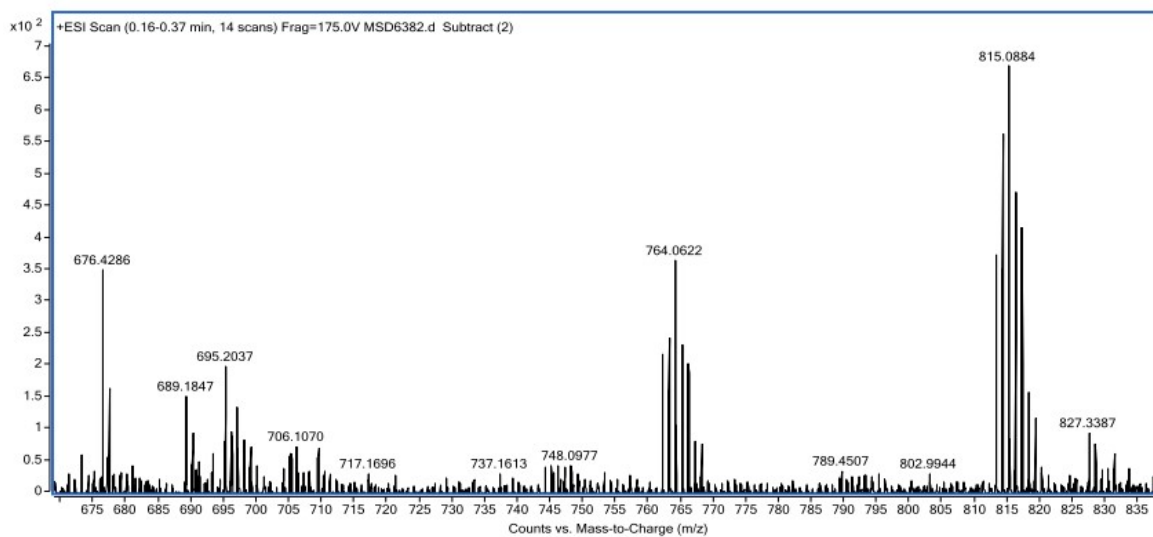

**Figure S18.** ESI-TOF(+) of complex  $2\text{-CHF}_2$ .

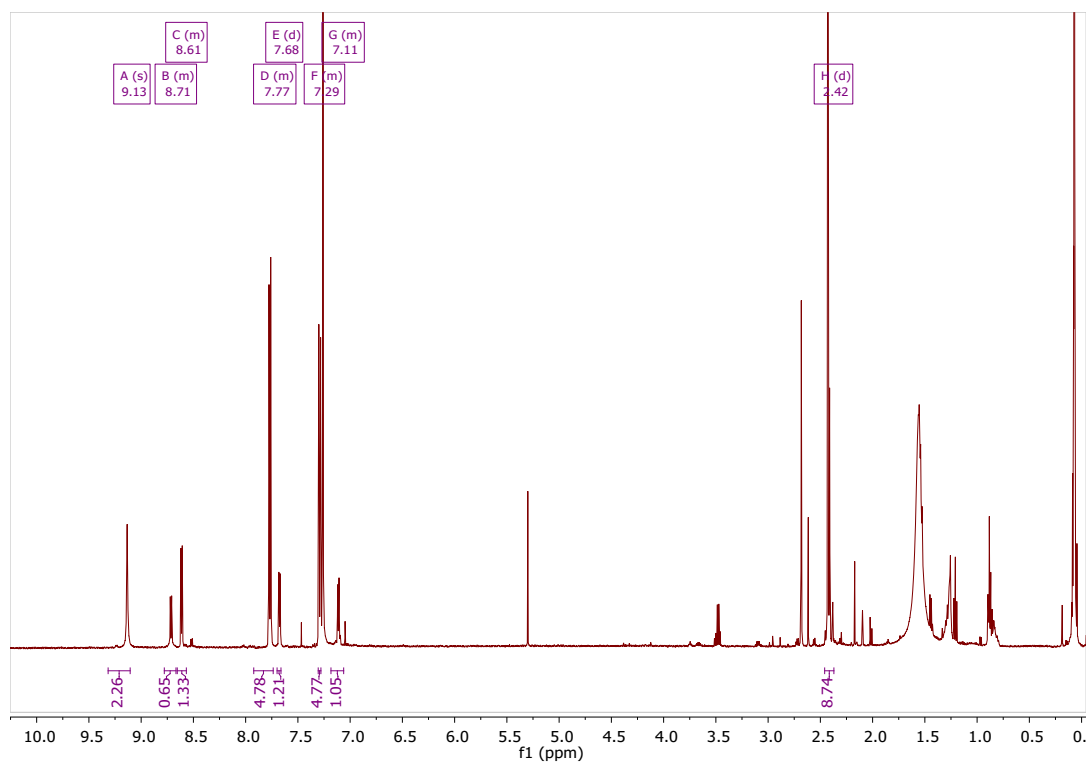

**Figure S19.**  $^1\text{H}$  NMR spectrum of complex **2-CH<sub>3</sub>** in  $\text{CDCl}_3$ .

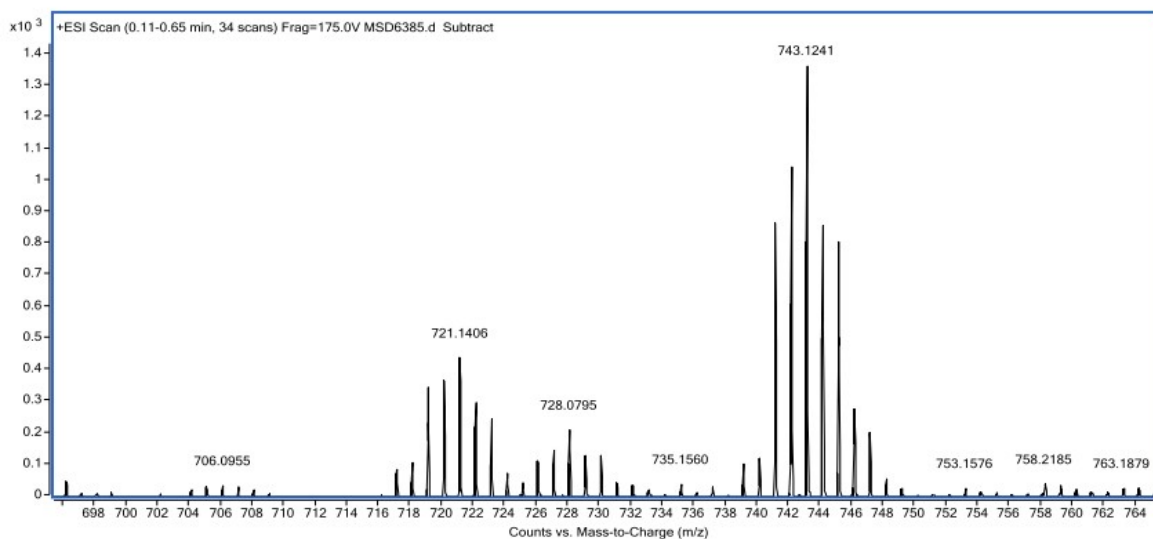

**Figure S20.** ESI-TOF(+) of complex **2-CH<sub>3</sub>**.

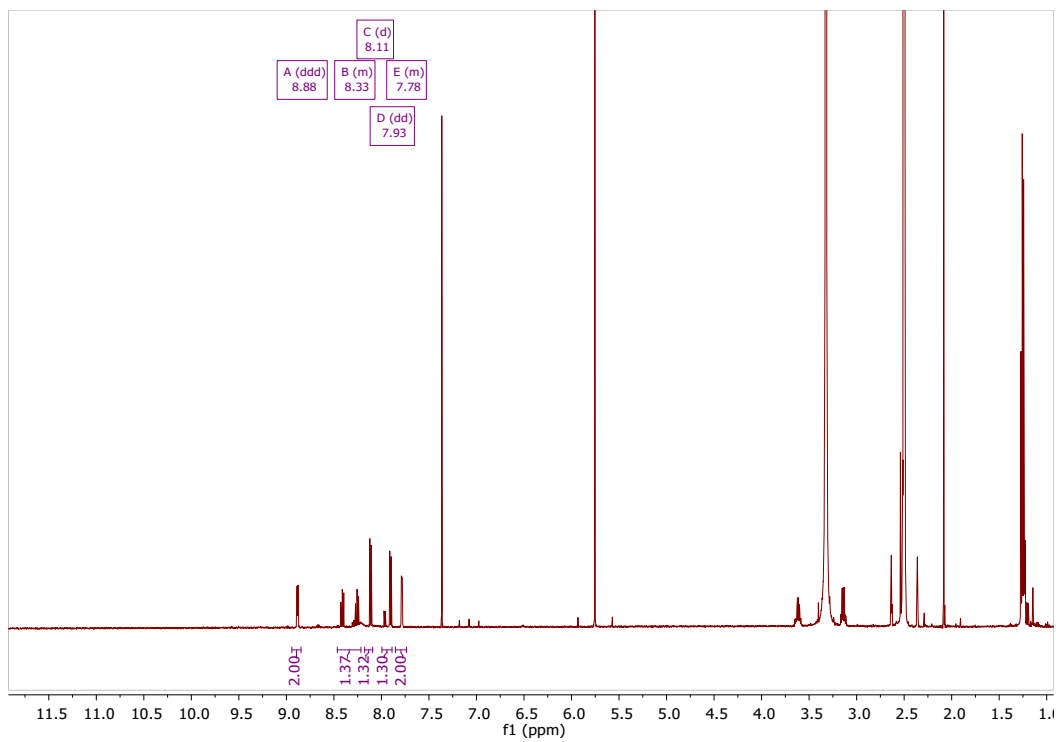

**Figure S21.** <sup>1</sup>H NMR spectrum of complex 3-CF<sub>3</sub> in DMSO-*d*<sup>6</sup>.

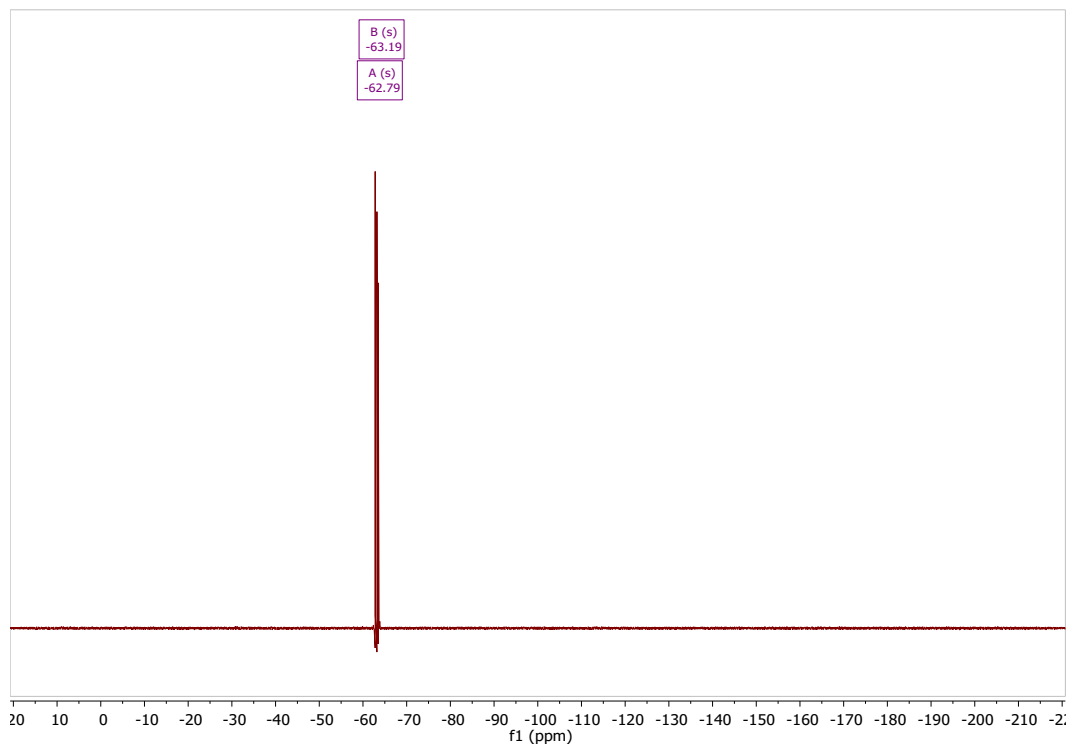

**Figure S22.** <sup>19</sup>F NMR spectrum of complex 3-CF<sub>3</sub> in DMSO-*d*<sup>6</sup>.

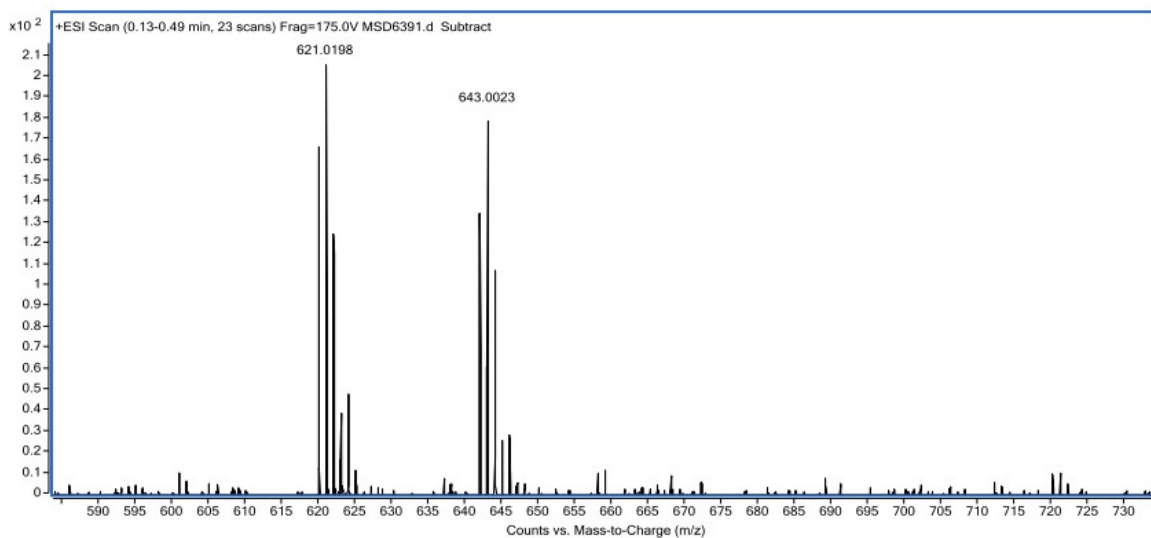

**Figure S23.** ESI-TOF(+) of complex **3-CF<sub>3</sub>**.

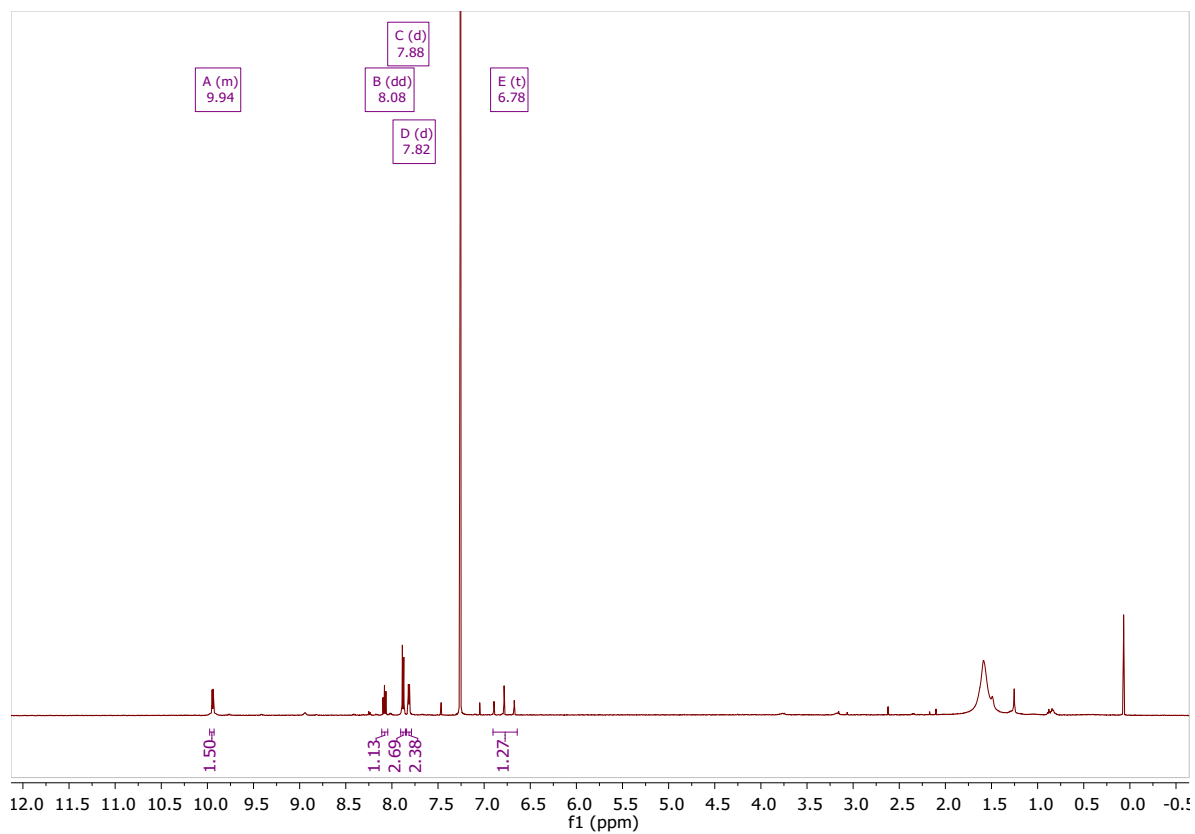

**Figure S24.** <sup>1</sup>H NMR spectrum of complex **3-CHF<sub>2</sub>** in CDCl<sub>3</sub>.

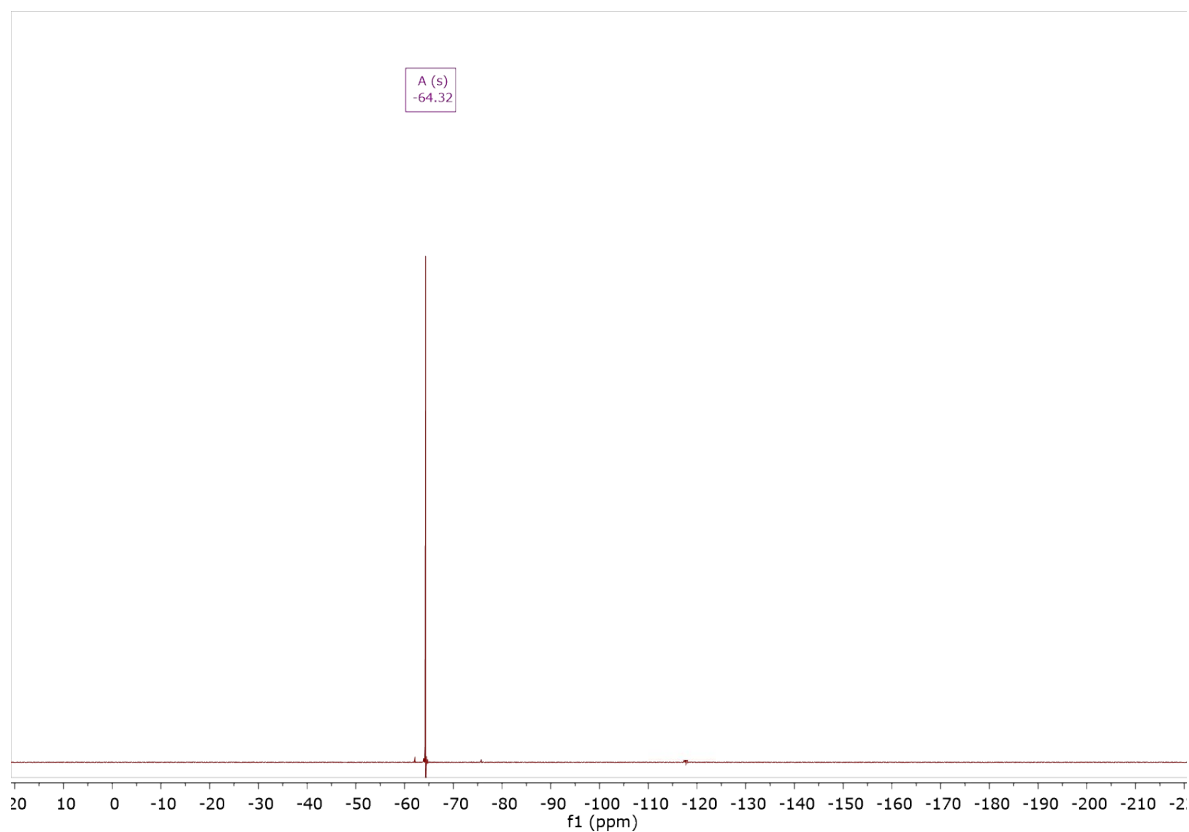

**Figure S25.**  $^{19}\text{F}$  NMR spectrum of complex **3-CHF<sub>2</sub>** in  $\text{CDCl}_3$ .

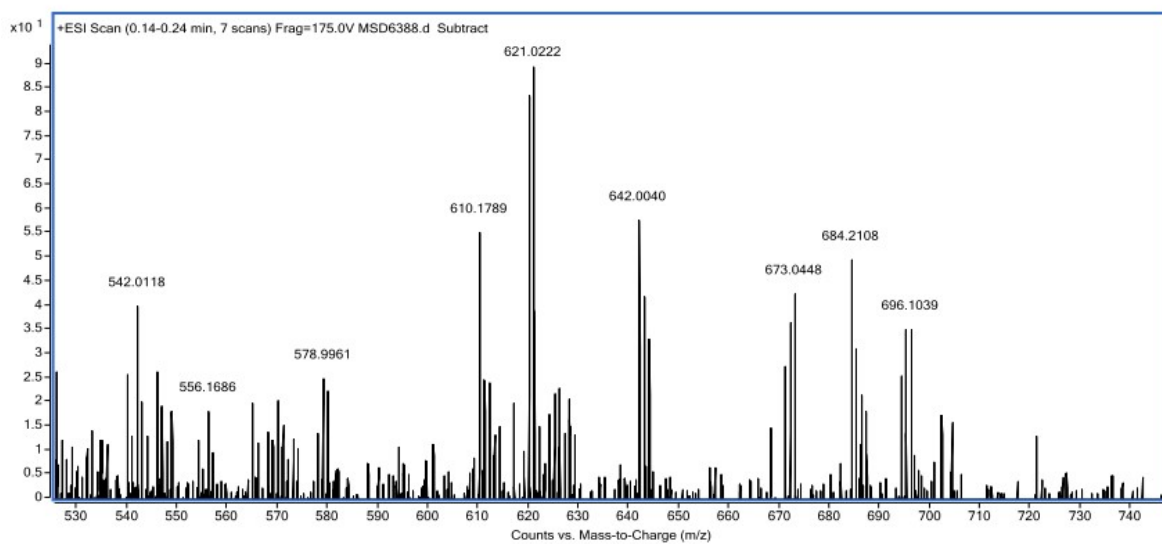

**Figure S26.** ESI-TOF(+) of complex **3-CHF<sub>2</sub>**.

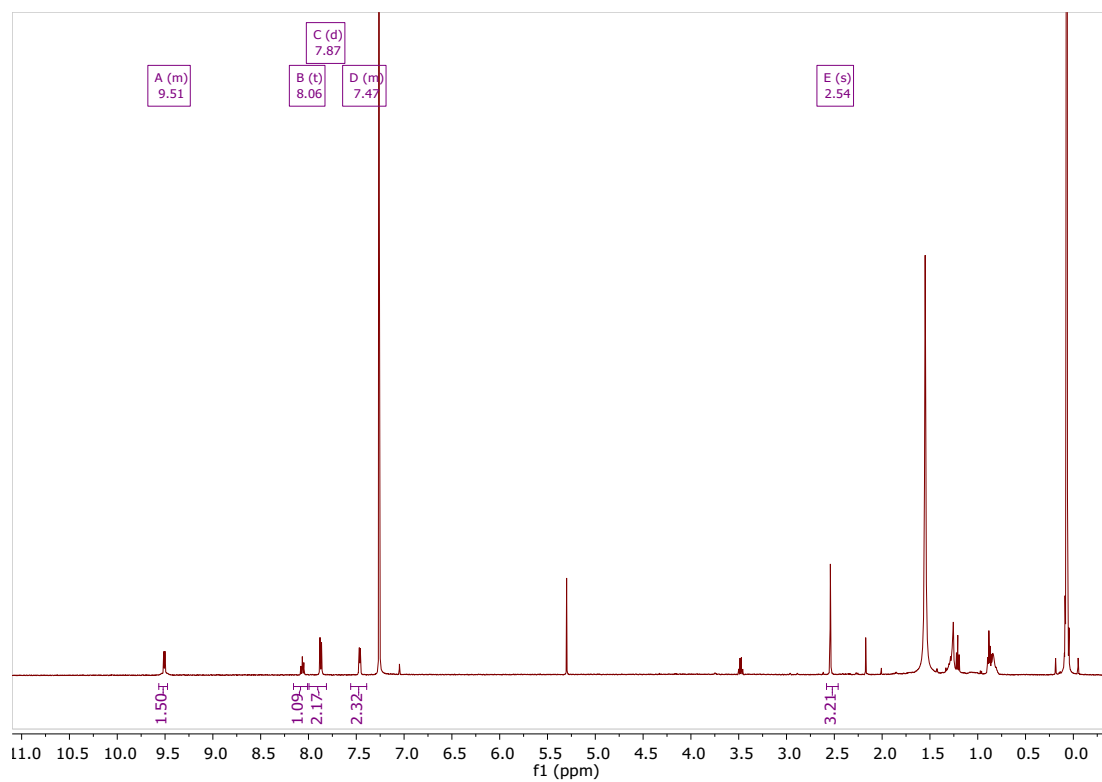

Figure S27.  $^1\text{H}$  NMR spectrum of complex **3-CH<sub>3</sub>** in  $\text{CDCl}_3$ .

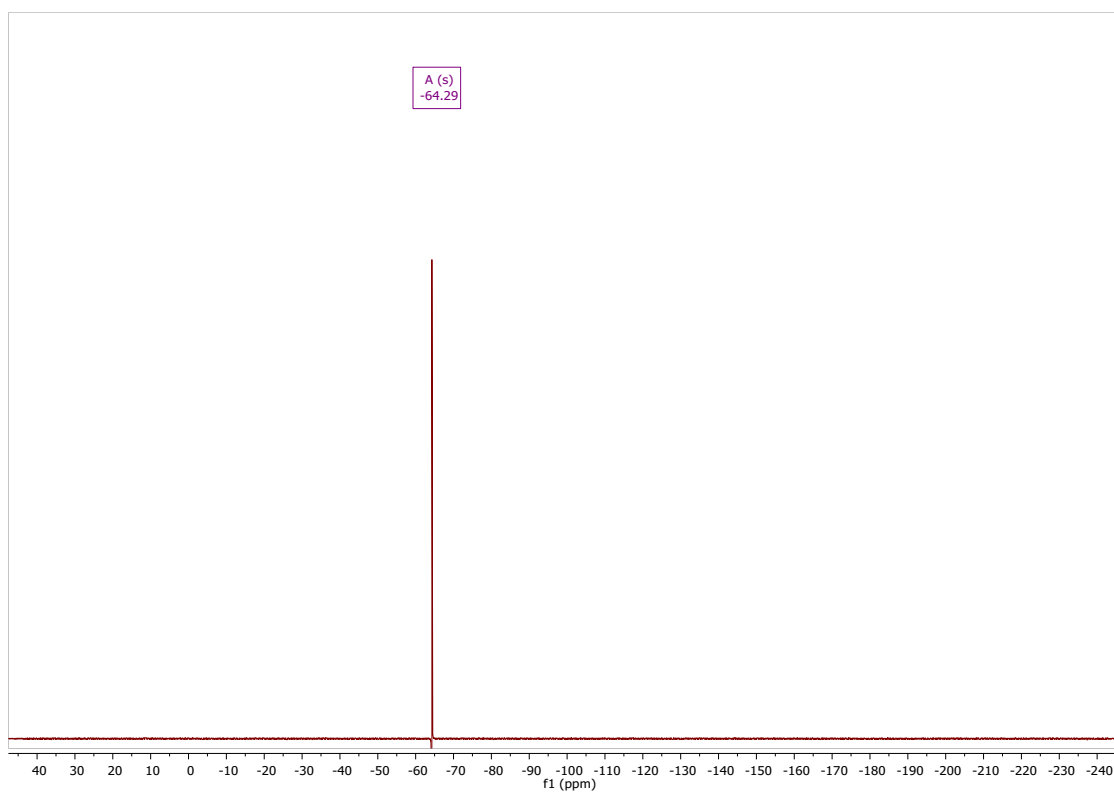

Figure S28.  $^{19}\text{F}$  NMR spectrum of complex **3-CH<sub>3</sub>** in  $\text{CDCl}_3$ .

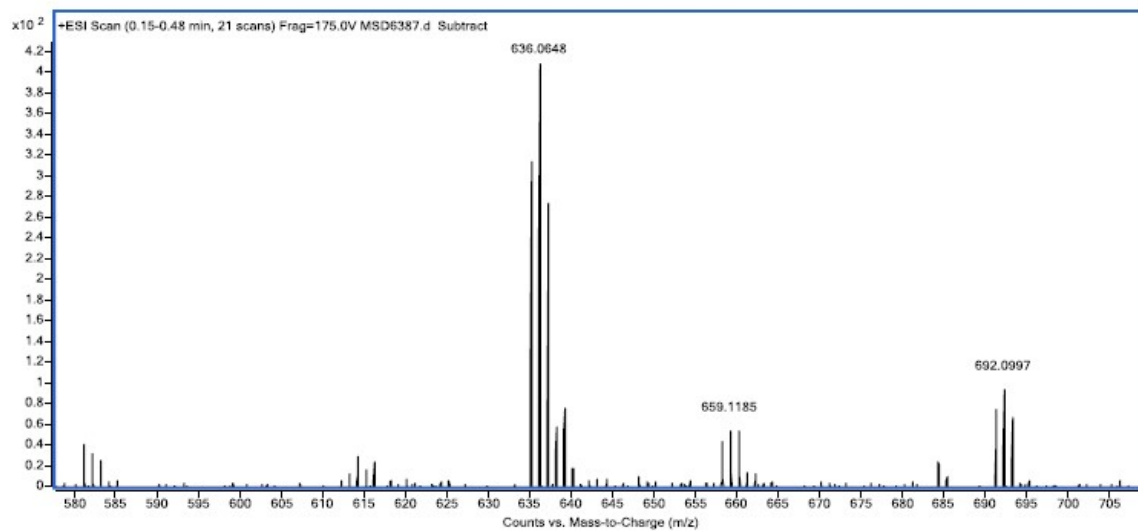

**Figure S29.** ESI-TOF(+) of complex **3-CH<sub>3</sub>**.

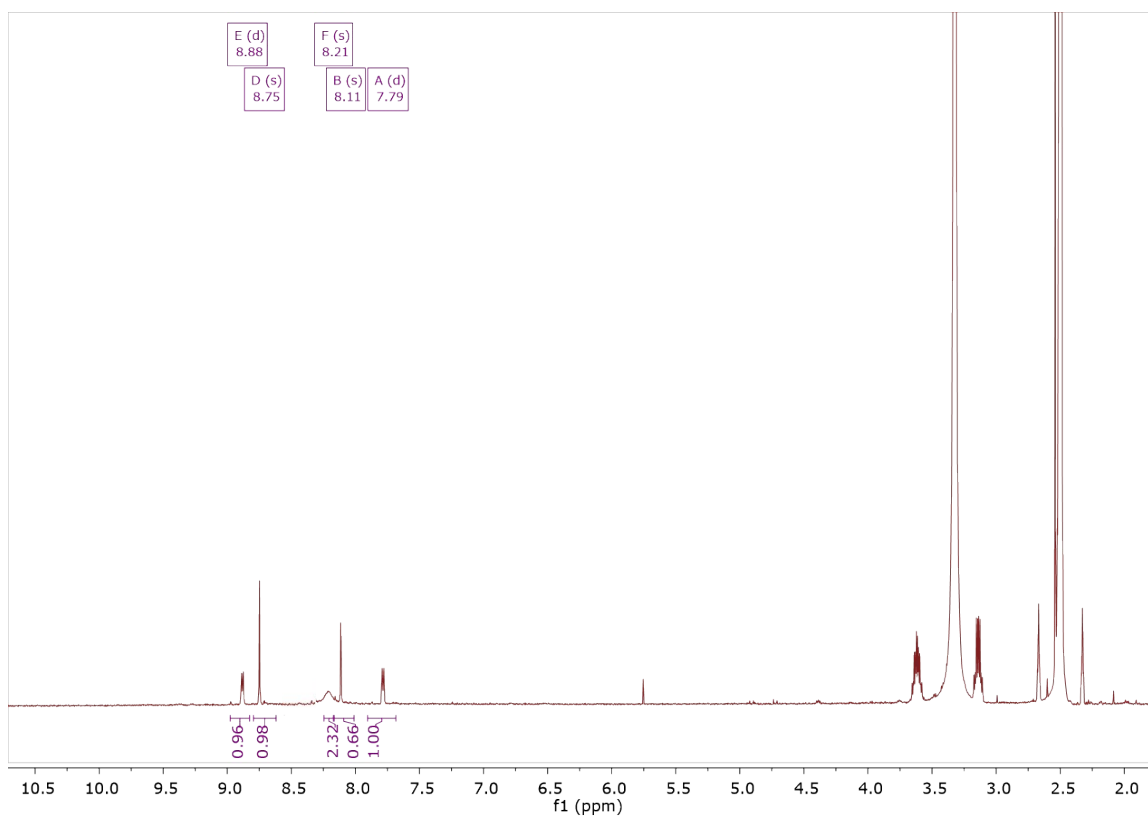

**Figure S30.** <sup>1</sup>H NMR spectrum of complex **4-CF<sub>3</sub>** in DMSO-*d*<sup>6</sup>.



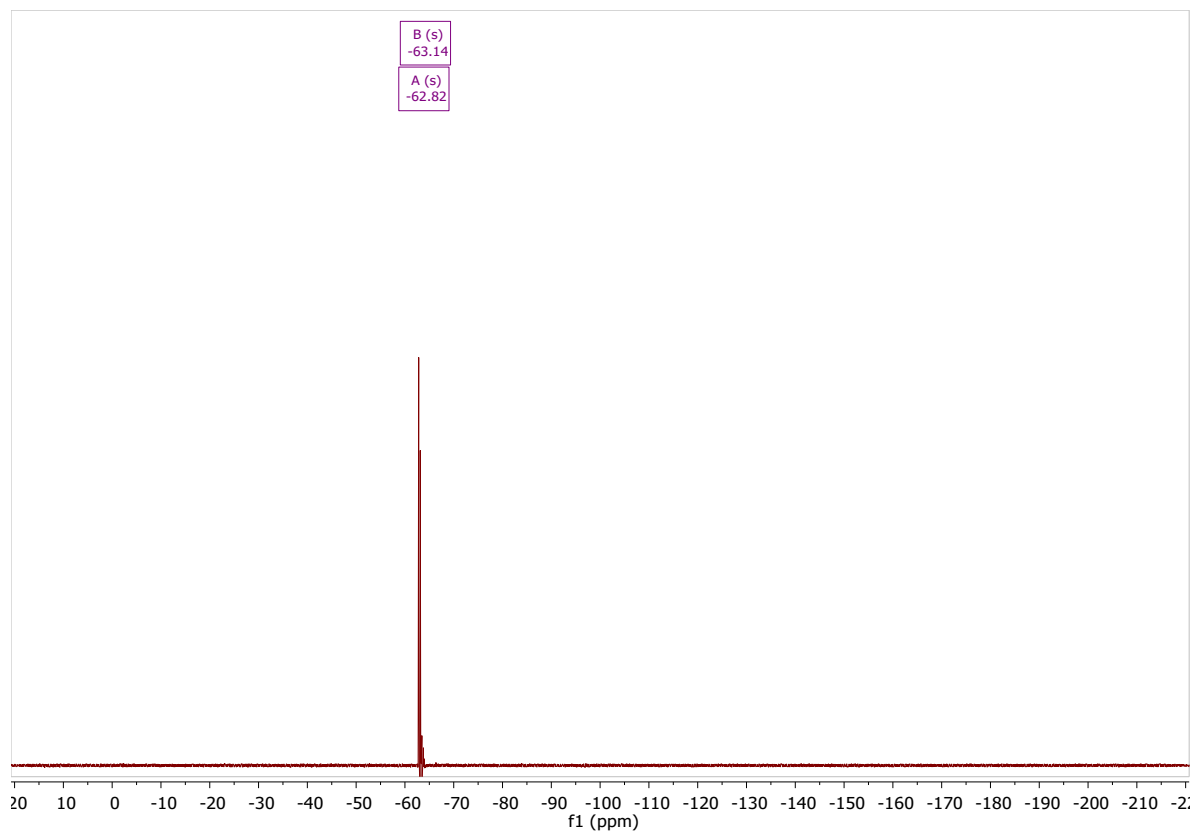

**Figure S31.**  $^{19}\text{F}$  NMR spectrum of complex  $4\text{-CF}_3$  in  $\text{DMSO-}d^6$ .

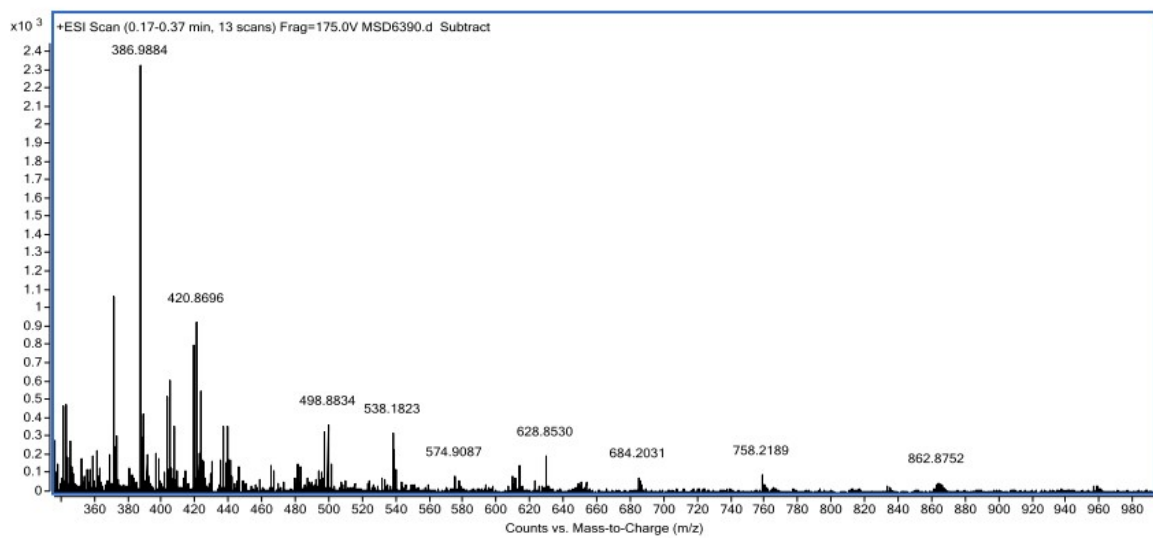

**Figure S32.** ESI-TOF(+) of complex  $4\text{-CF}_3$ .

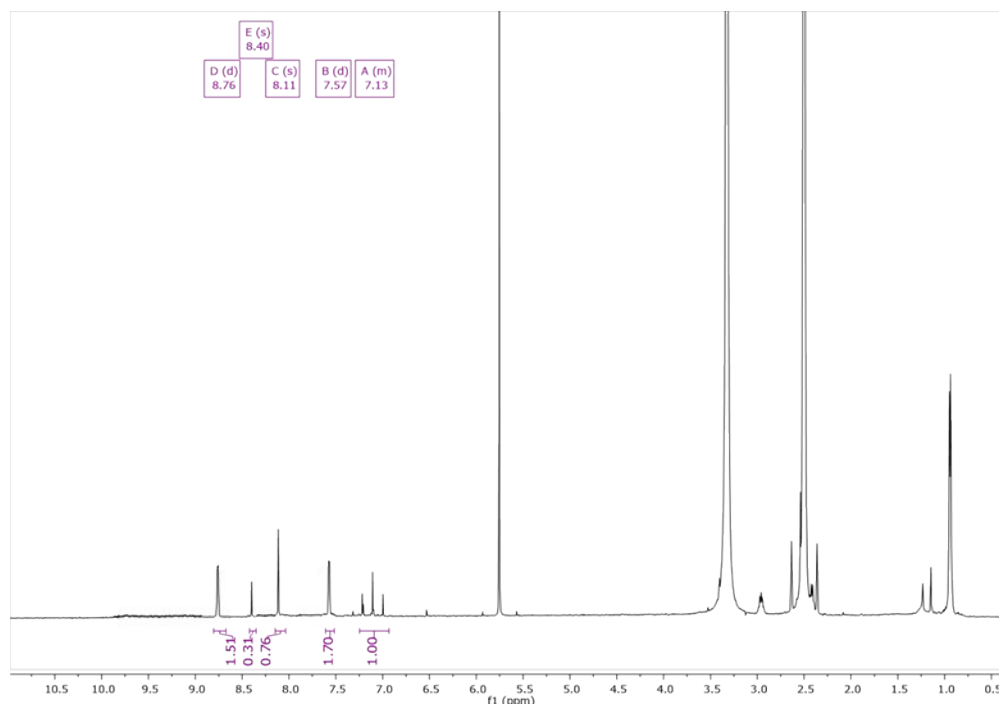

**Figure S33.**  $^1\text{H}$  NMR spectrum of complex **4-CHF<sub>2</sub>** in  $\text{DMSO-}d^6$ .

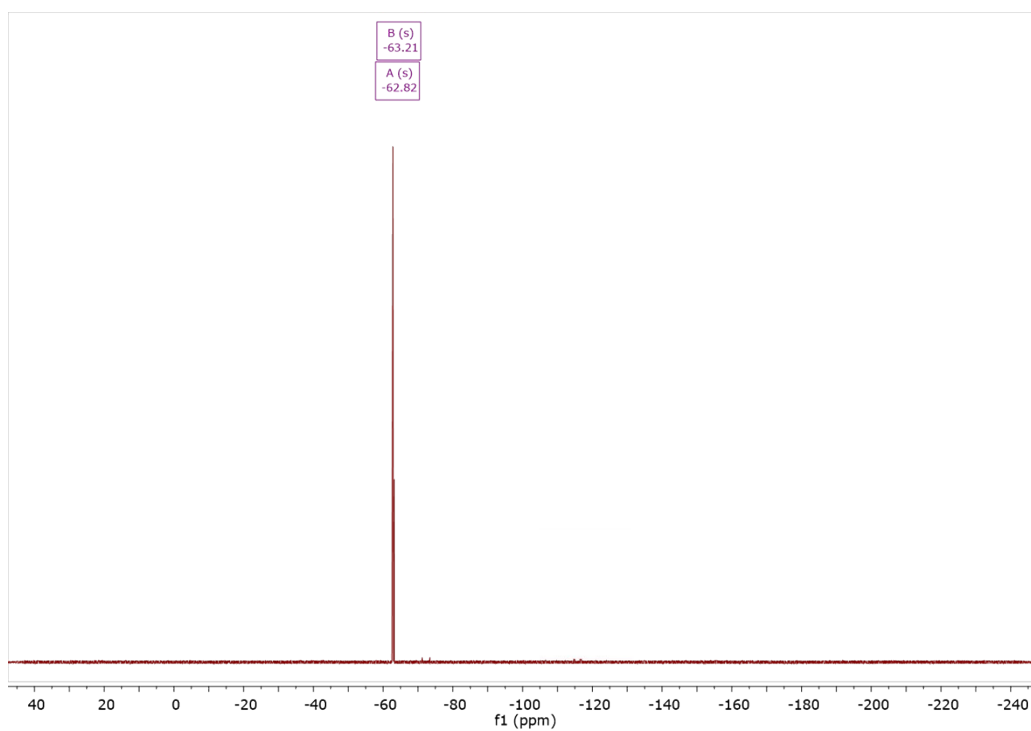

**Figure S34.**  $^{19}\text{F}$  NMR spectrum of complex **4-CHF<sub>2</sub>** in  $\text{DMSO-}d^6$ .

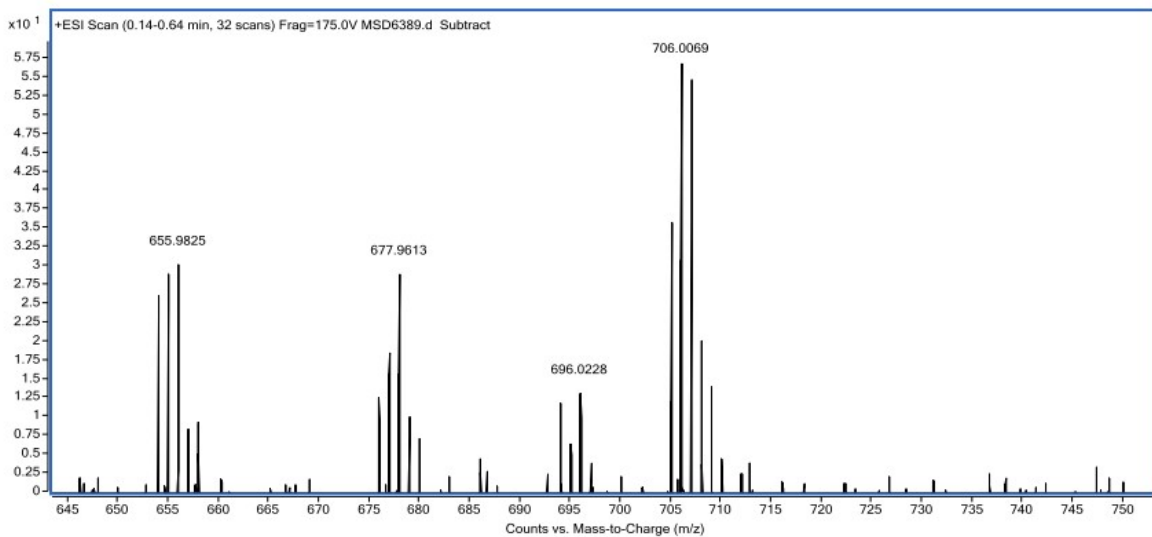

**Figure S35.** ESI-TOF(+) of complex **4-CHF<sub>2</sub>**.

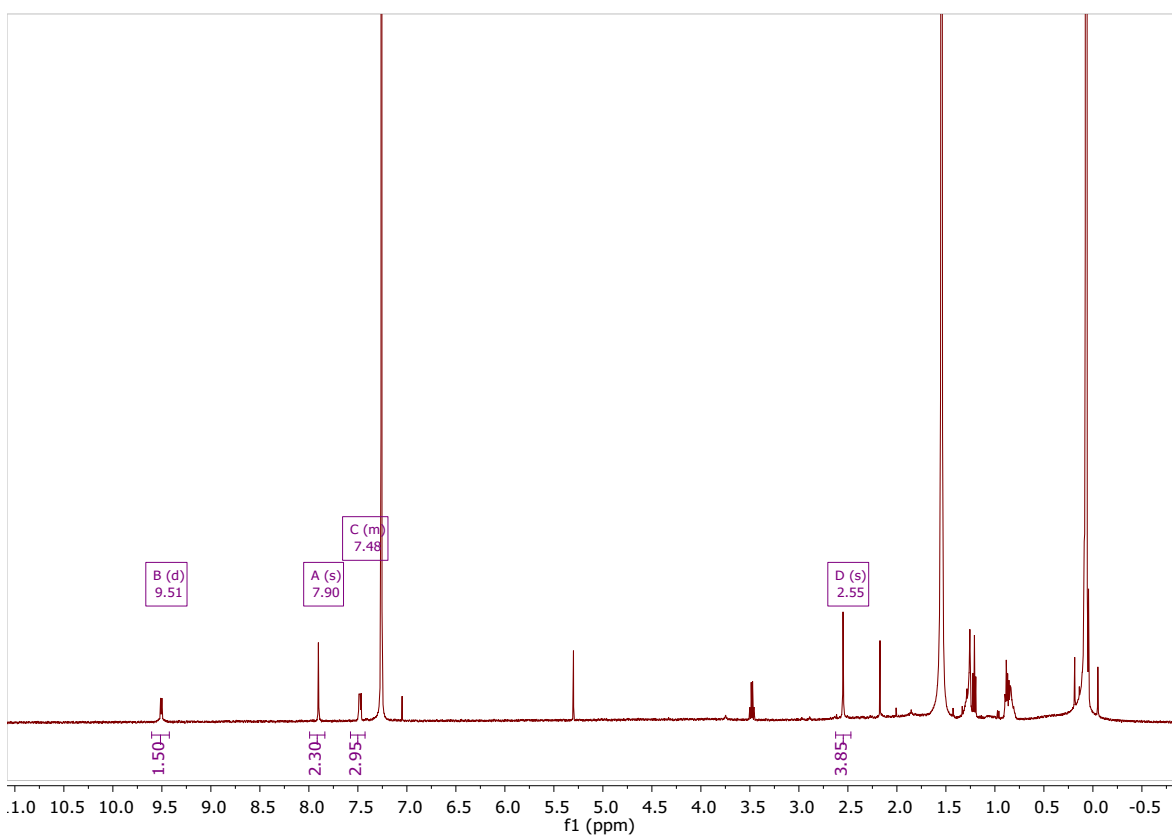

**Figure S36.** <sup>1</sup>H NMR spectrum of complex **4-CH<sub>3</sub>** in CDCl<sub>3</sub>.

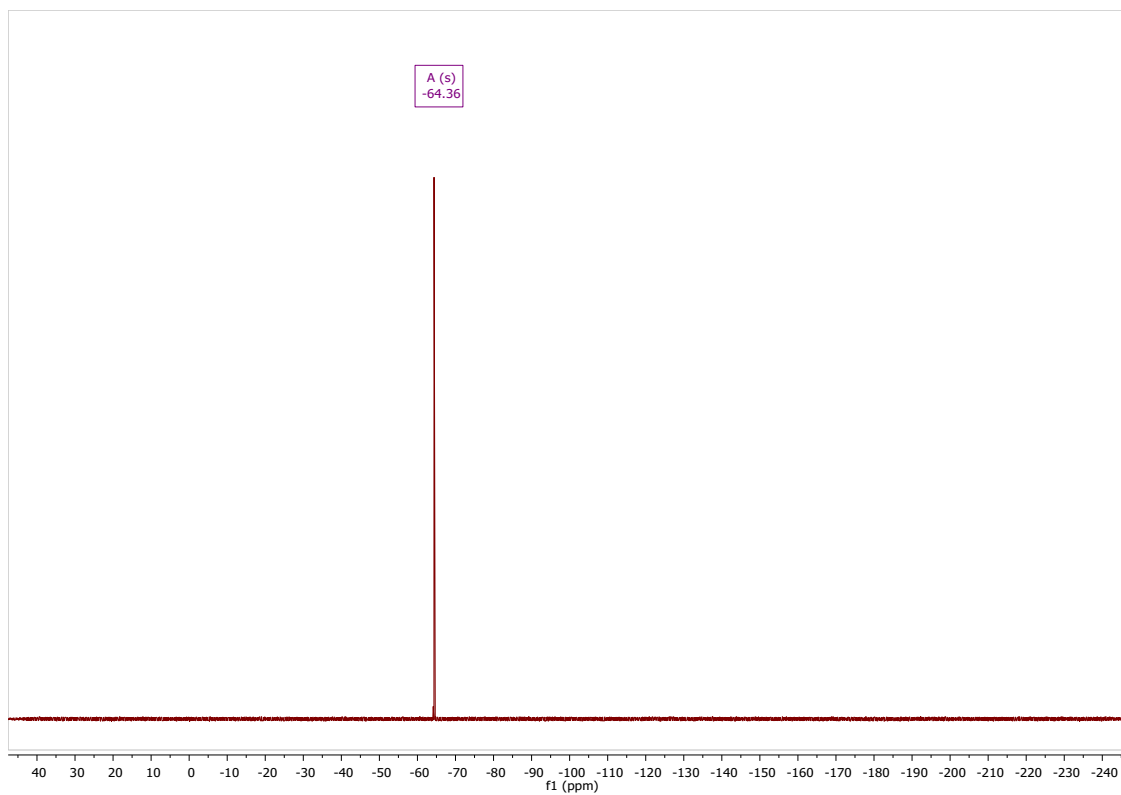

**Figure S37.**  $^{19}\text{F}$  NMR spectrum of complex **4-CH<sub>3</sub>** in  $\text{CDCl}_3$ .

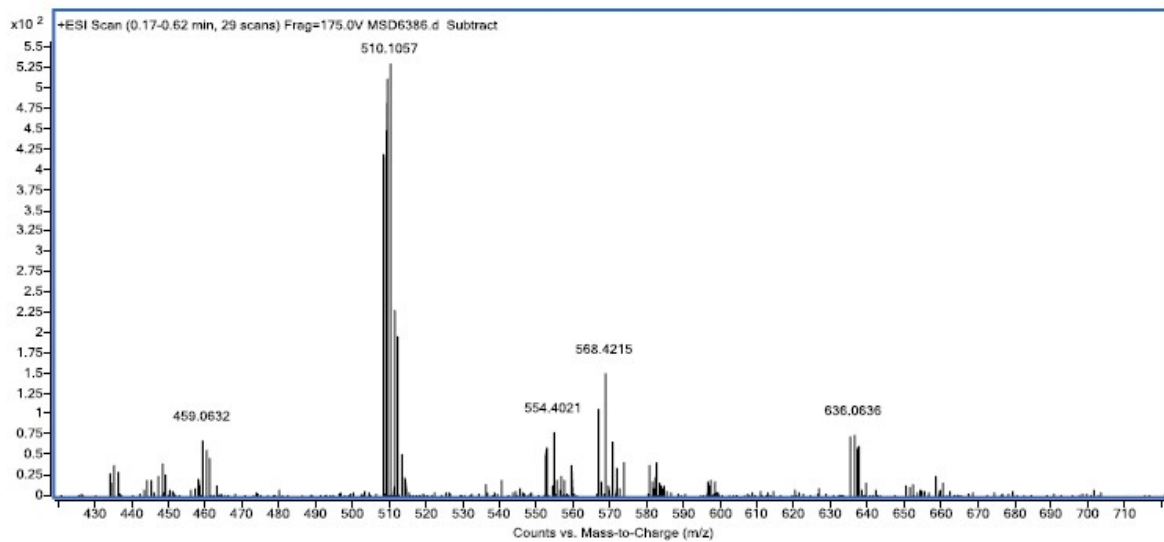

**Figure S38.** ESI-TOF(+) of complex **4-CH<sub>3</sub>**.

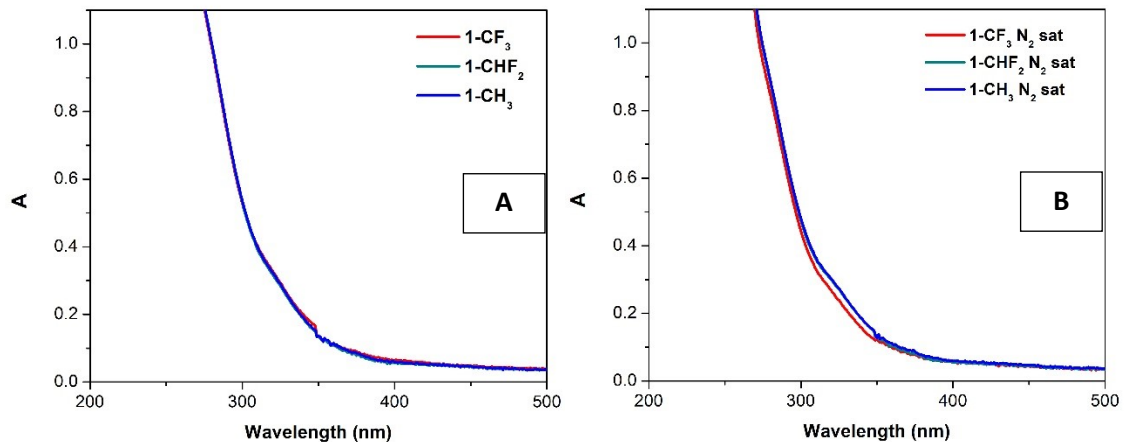

**Figure S39.** Absorption spectra of  $10^{-5}$  M DMSO air-equilibrated (A) and  $N_2$  saturated solutions of compounds **1-CF<sub>3</sub>**, **1-CHF<sub>2</sub>**, and **1-CH<sub>3</sub>**.

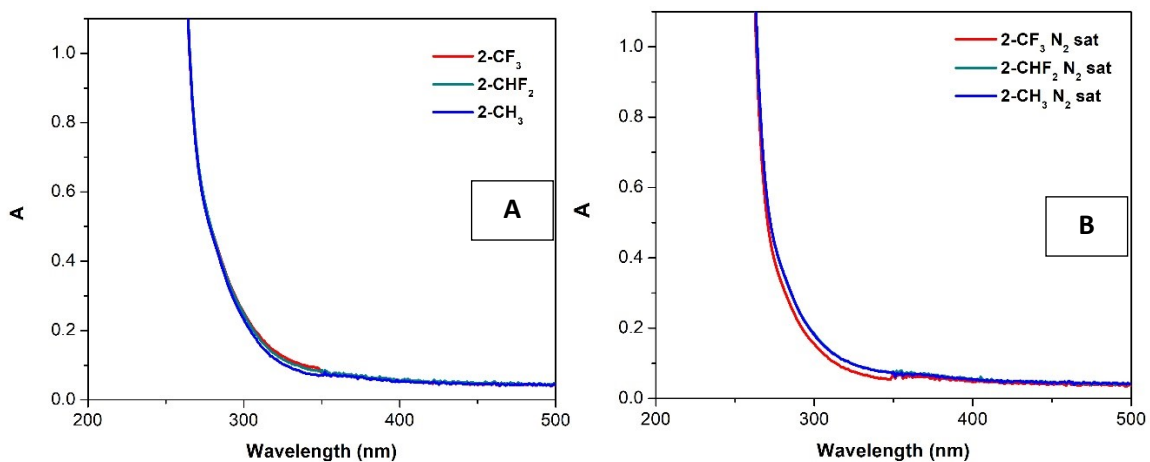

**Figure S40.** Absorption spectra of  $10^{-5}$  M DMSO air-equilibrated (A) and  $N_2$  saturated solutions of compounds **2-CF<sub>3</sub>**, **2-CHF<sub>2</sub>**, and **2-CH<sub>3</sub>**.

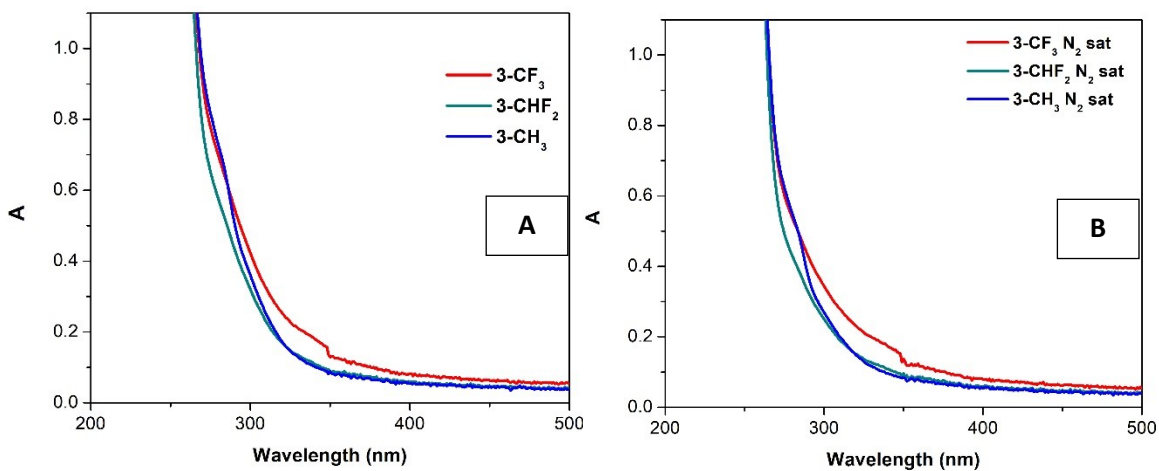

**Figure S41.** Absorption spectra of  $10^{-5}$  M DMSO air-equilibrated (A) and  $N_2$  saturated solutions of compounds **3-CF<sub>3</sub>**, **3-CHF<sub>2</sub>**, and **3-CH<sub>3</sub>**.

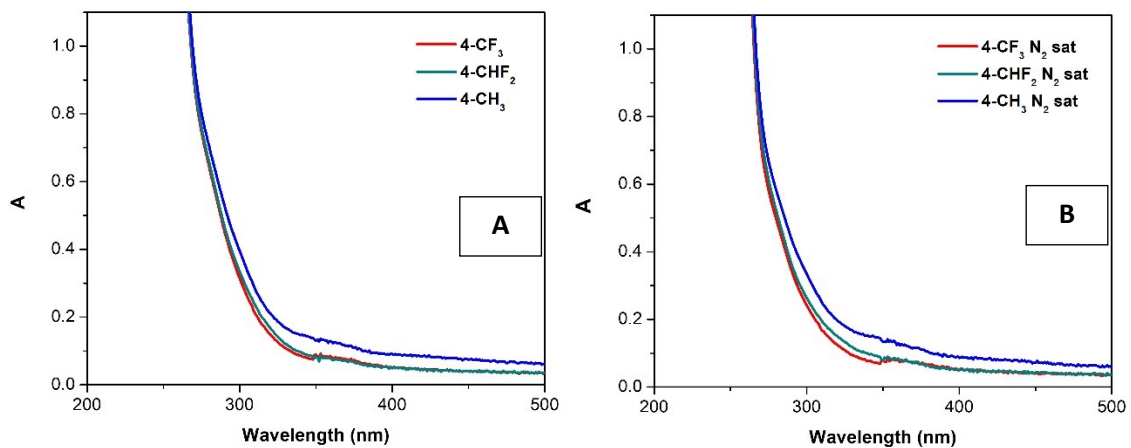

**Figure S42.** Absorption spectra of  $10^{-5}$  M DMSO air-equilibrated (A) and  $N_2$  saturated solutions of compounds **4-CF<sub>3</sub>**, **4-CHF<sub>2</sub>**, and **4-CH<sub>3</sub>**.

**Table S1.** Calculated wavelengths of absorption, transition energies, and oscillator strength computed at the CAM-B3LYP/def2-TZVP level

| <b>Complex</b>           | <b>Wavelength (nm)</b> | <b>Energy (eV)</b> | <b>Oscillator strength</b> | <b>Transitions</b>             |
|--------------------------|------------------------|--------------------|----------------------------|--------------------------------|
| <b>1-CF<sub>3</sub></b>  | 376                    | 3.298              | 0.0170                     | S <sub>0</sub> →S <sub>1</sub> |
|                          | 305                    | 4.060              | 0.0160                     | S <sub>0</sub> →S <sub>2</sub> |
| <b>1-CHF<sub>2</sub></b> | 375                    | 3.308              | 0.0184                     | S <sub>0</sub> →S <sub>1</sub> |
|                          | 305                    | 4.062              | 0.0158                     | S <sub>0</sub> →S <sub>2</sub> |
| <b>1-CH<sub>3</sub></b>  | 373                    | 3.327              | 0.0204                     | S <sub>0</sub> →S <sub>1</sub> |
|                          | 304                    | 4.084              | 0.0159                     | S <sub>0</sub> →S <sub>2</sub> |
| <b>2-CF<sub>3</sub></b>  | 382                    | 3.244              | 0.0184                     | S <sub>0</sub> →S <sub>1</sub> |
| <b>2-CHF<sub>2</sub></b> | 381                    | 3.256              | 0.0201                     | S <sub>0</sub> →S <sub>1</sub> |
| <b>2-CH<sub>3</sub></b>  | 379                    | 3.271              | 0.0220                     | S <sub>0</sub> →S <sub>1</sub> |
| <b>3-CF<sub>3</sub></b>  | 338                    | 3.670              | 0.0098                     | S <sub>0</sub> →S <sub>1</sub> |
| <b>3-CHF<sub>2</sub></b> | 337                    | 3.674              | 0.0100                     | S <sub>0</sub> →S <sub>1</sub> |
| <b>3-CH<sub>3</sub></b>  | 337                    | 3.682              | 0.0100                     | S <sub>0</sub> →S <sub>1</sub> |
| <b>4-CF<sub>3</sub></b>  | 341                    | 3.633              | 0.0079                     | S <sub>0</sub> →S <sub>1</sub> |
| <b>4-CHF<sub>2</sub></b> | 341                    | 3.637              | 0.0080                     | S <sub>0</sub> →S <sub>1</sub> |
|                          | 316                    | 3.930              | 0.0002                     | S <sub>0</sub> →S <sub>2</sub> |
| <b>4-CH<sub>3</sub></b>  | 341                    | 3.639              | 0.0079                     | S <sub>0</sub> →S <sub>1</sub> |
|                          | 314                    | 3.941              | 0.0000                     | S <sub>0</sub> →S <sub>2</sub> |

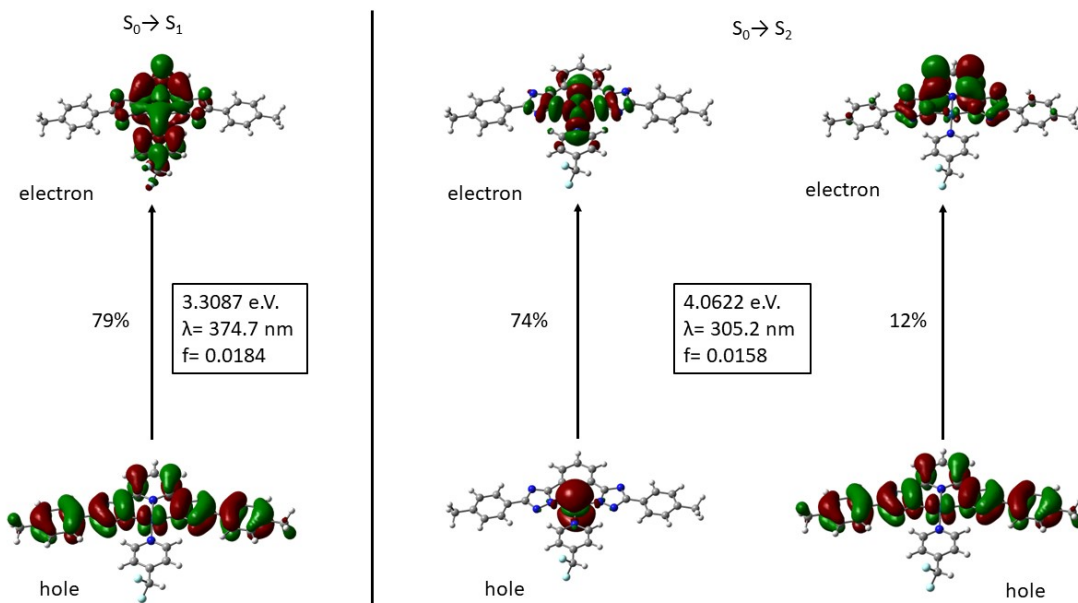

**Figure S34.** Representation of the NTOs involved in the  $S_0 \rightarrow S_1$  (left)  $S_0 \rightarrow S_2$  (right) excitation of compound **1-CHF<sub>2</sub>**, with indication of the theoretical  $\lambda_{\text{exc}}$ , oscillator strength and relative contribution of each NTO pair.

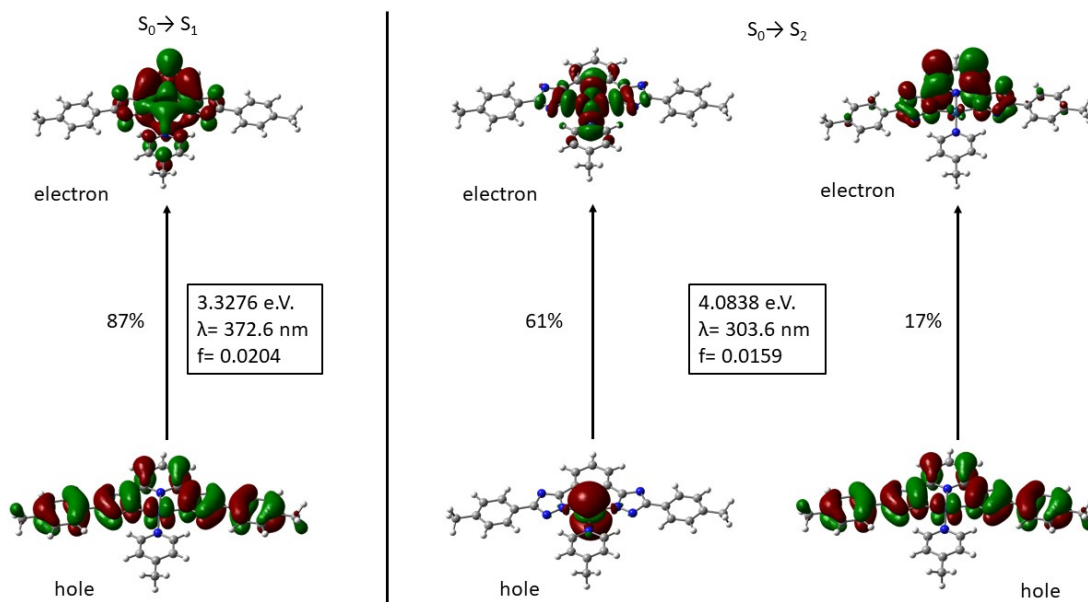

**Figure S44.** Representation of the NTOs involved in the  $S_0 \rightarrow S_1$  (left)  $S_0 \rightarrow S_2$  (right) excitation of compound **1-CH<sub>3</sub>**, with indication of the theoretical  $\lambda_{\text{exc}}$ , oscillator strength and relative contribution of each NTO pair.



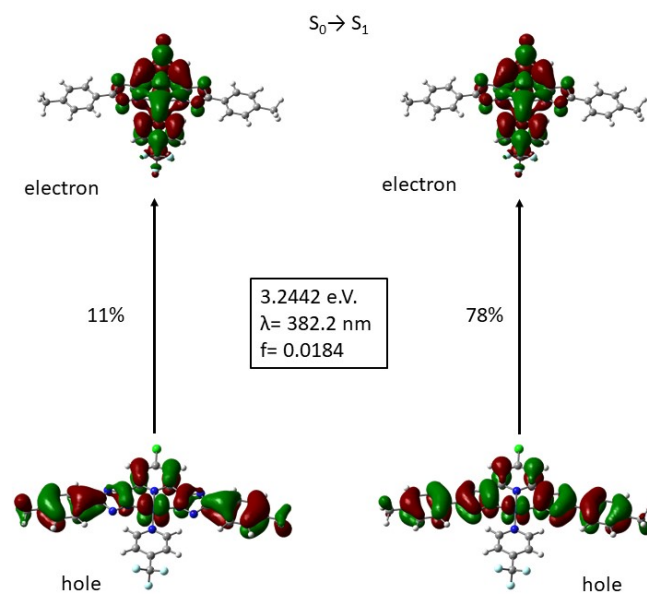

**Figure S45.** Representation of the NTOs involved in the  $S_0 \rightarrow S_1$  excitation of compound **2-CF<sub>3</sub>**, with indication of the theoretical  $\lambda_{\text{exc}}$ , oscillator strength and relative contribution of each NTO pair.

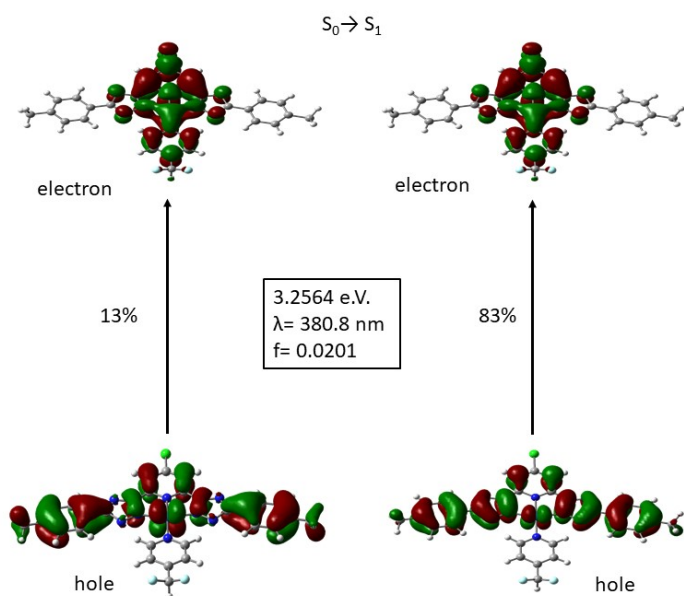

**Figure S46.** Representation of the NTOs involved in the  $S_0 \rightarrow S_1$  excitation of compound **2-CHF<sub>2</sub>**, with indication of the theoretical  $\lambda_{\text{exc}}$ , oscillator strength and relative contribution of each NTO pair.

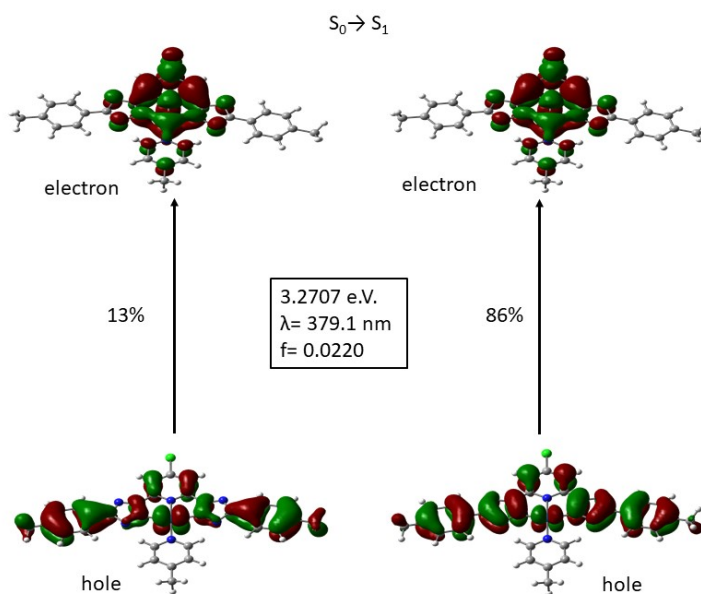

**Figure S47.** Representation of the NTOs involved in the  $S_0 \rightarrow S_1$  (left) excitation of compound **2-CH<sub>3</sub>**, with indication of the theoretical  $\lambda_{\text{exc}}$ , oscillator strength and relative contribution of each NTO pair.

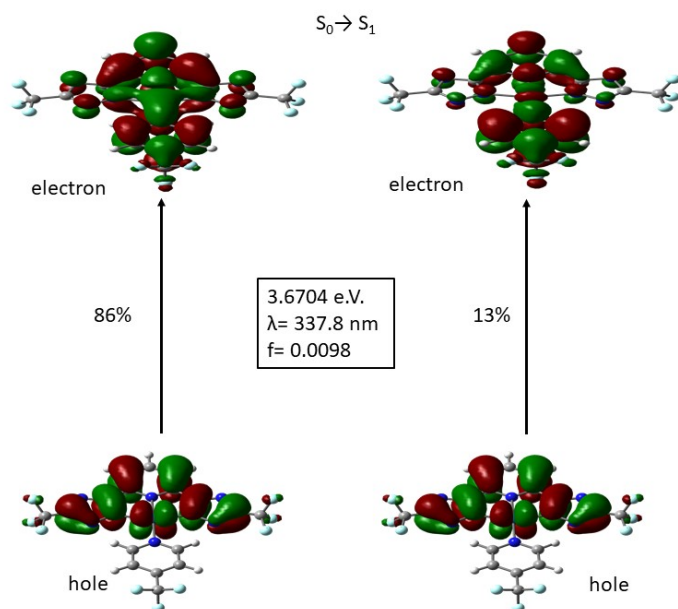

**Figure S48.** Representation of the NTOs involved in the  $S_0 \rightarrow S_1$  excitation of compound **3-CF<sub>3</sub>**, with indication of the theoretical  $\lambda_{\text{exc}}$ , oscillator strength and relative contribution of each NTO pair.

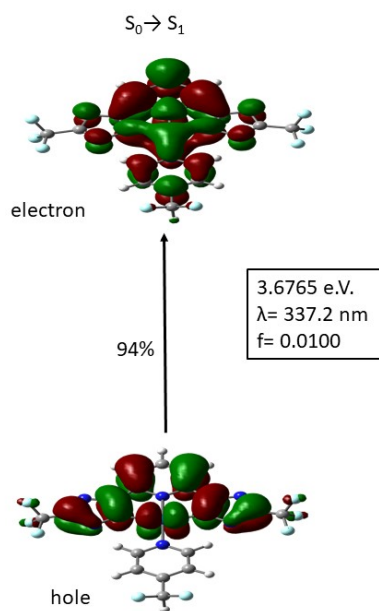

**Figure S49.** Representation of the NTOs involved in the  $S_0 \rightarrow S_1$  excitation of compound **3-CHF<sub>2</sub>**, with indication of the theoretical  $\lambda_{\text{exc}}$ , oscillator strength and relative contribution of each NTO pair.

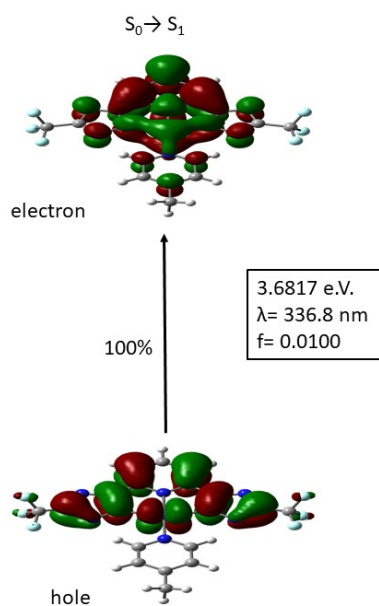

**Figure S50.** Representation of the NTOs involved in the  $S_0 \rightarrow S_1$  excitation of compound **3-CH<sub>3</sub>**, with indication of the theoretical  $\lambda_{\text{exc}}$ , oscillator strength and relative contribution of each NTO pair.

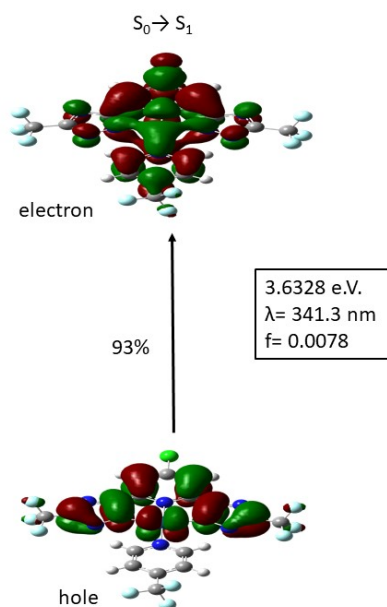

**Figure S51.** Representation of the NTOs involved in the  $S_0 \rightarrow S_1$  excitation of compound **4-CF<sub>3</sub>**, with indication of the theoretical  $\lambda_{\text{exc}}$ , oscillator strength and relative contribution of each NTO pair.

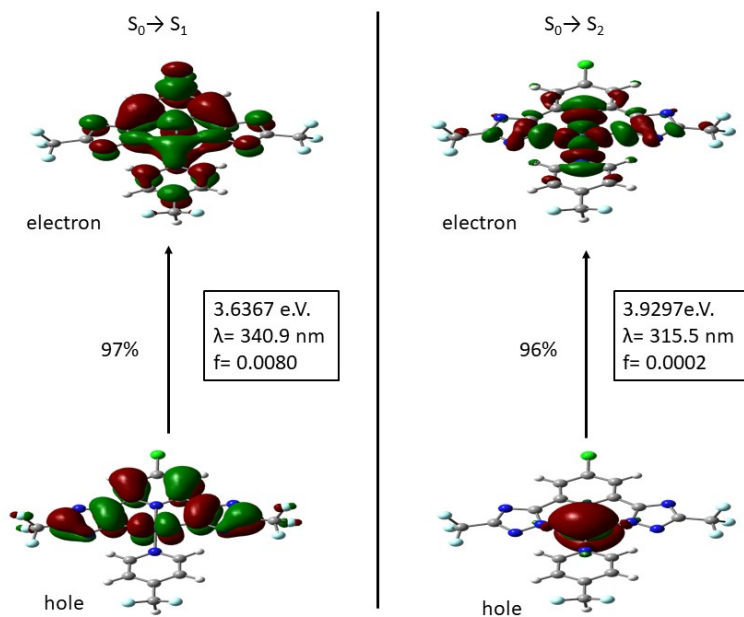

**Figure S52.** Representation of the NTOs involved in the  $S_0 \rightarrow S_1$  (left)  $S_0 \rightarrow S_2$  (right) excitation of compound **4-CHF<sub>2</sub>**, with indication of the theoretical  $\lambda_{\text{exc}}$ , oscillator strength and relative contribution of each NTO pair.

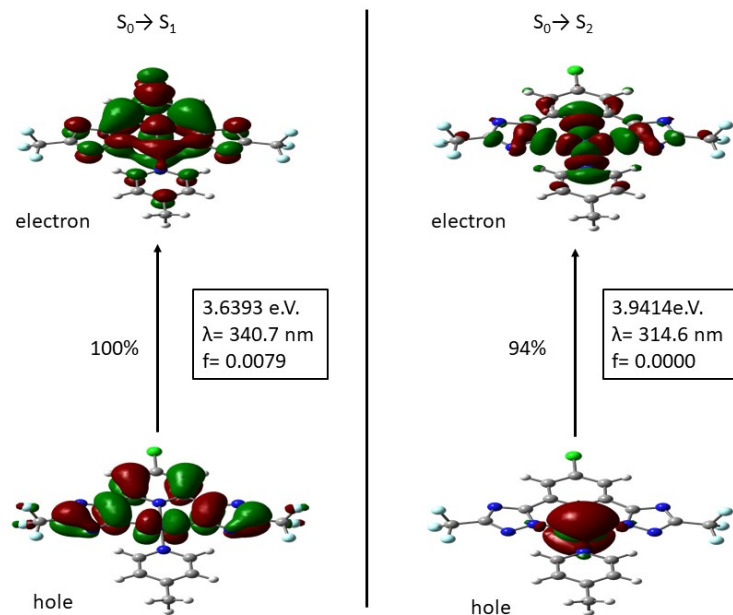

**Figure S53.** Representation of the NTOs involved in the  $S_0 \rightarrow S_1$  (left)  $S_0 \rightarrow S_2$  (right) excitation of compound **4-CH<sub>3</sub>**, with indication of the theoretical  $\lambda_{exc}$ , oscillator strength and relative contribution of each NTO pair.

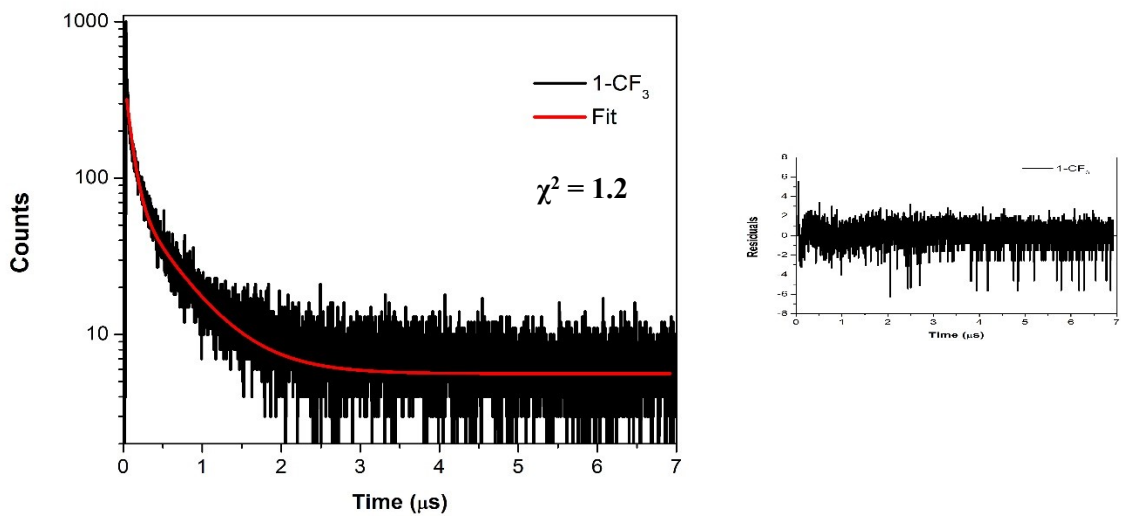

Figure S54. Phosphorescence lifetime and residuals of **1-CF<sub>3</sub>** in solid state.

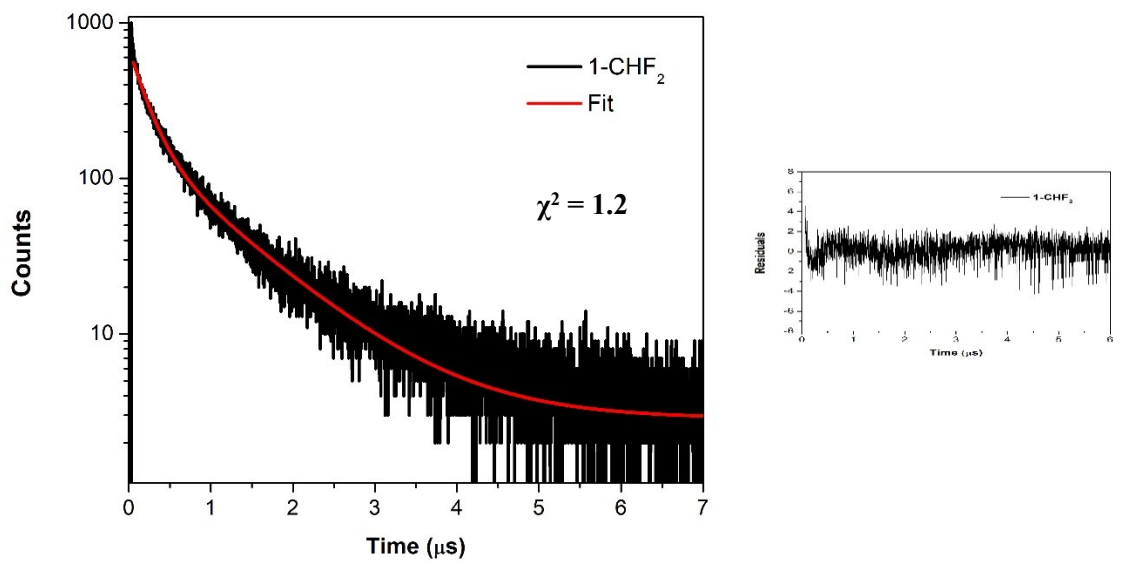

Figure S55. Phosphorescence lifetime and residuals of **1-CHF<sub>2</sub>** in solid state.

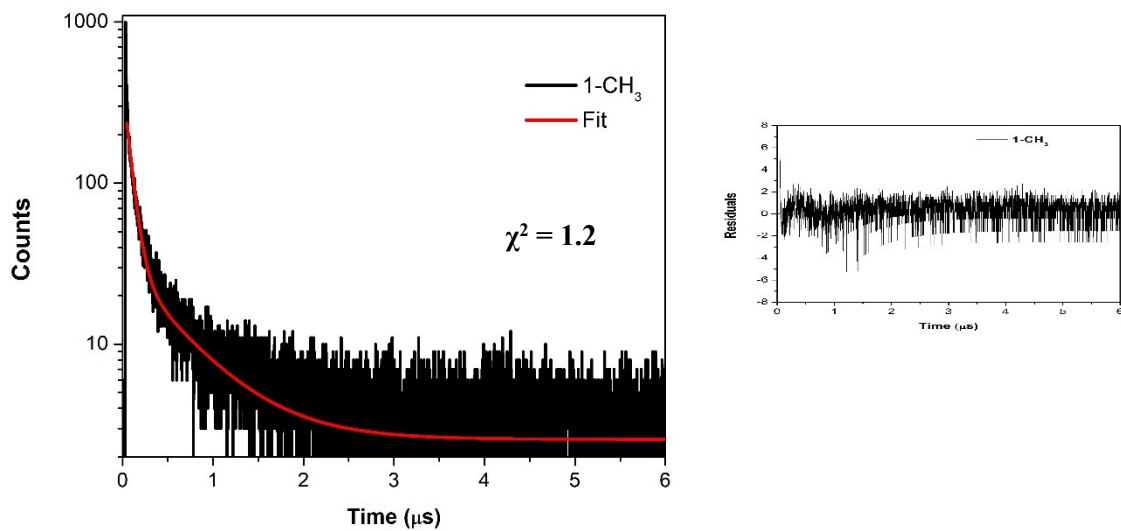

Figure S56. Phosphorescence lifetime and residuals of **1-CH<sub>3</sub>** in solid state.

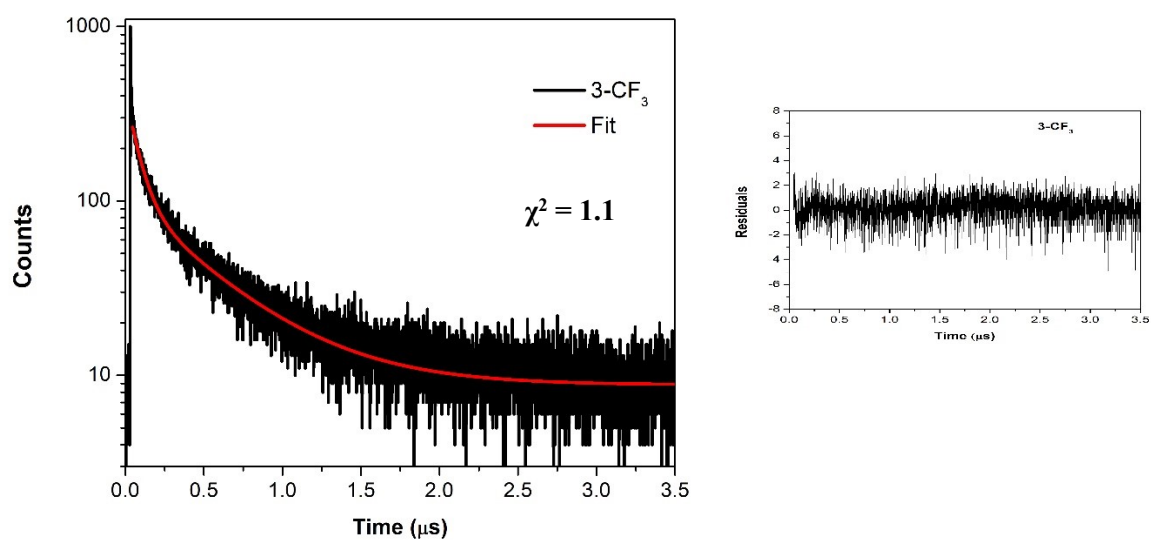

Figure S57. Phosphorescence lifetime and residuals of **3-CF<sub>3</sub>** in solid state.

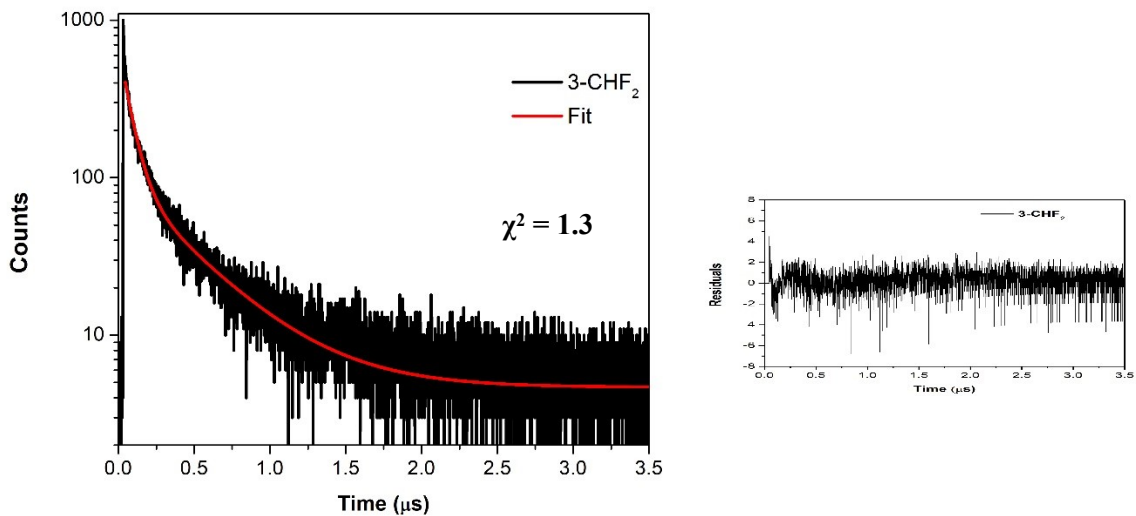

**Figure S58.** Phosphorescence lifetime and residuals of  $3\text{-CHF}_2$  in solid state.

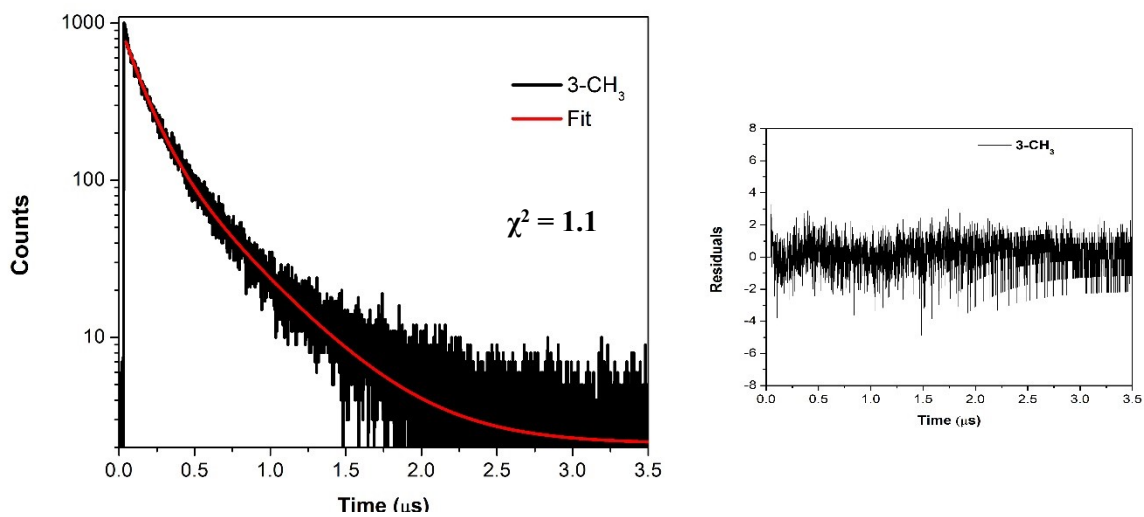

**Figure S59.** Phosphorescence lifetime and residuals of  $3\text{-CH}_3$  in solid state.



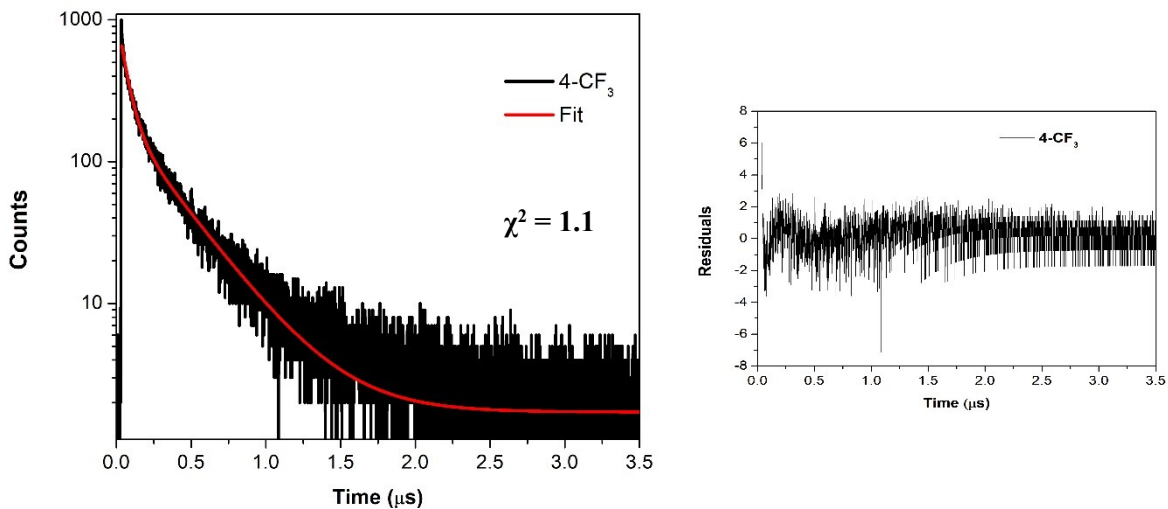

Figure S60. Phosphorescence lifetime and residuals of **4-CF<sub>3</sub>** in solid state.

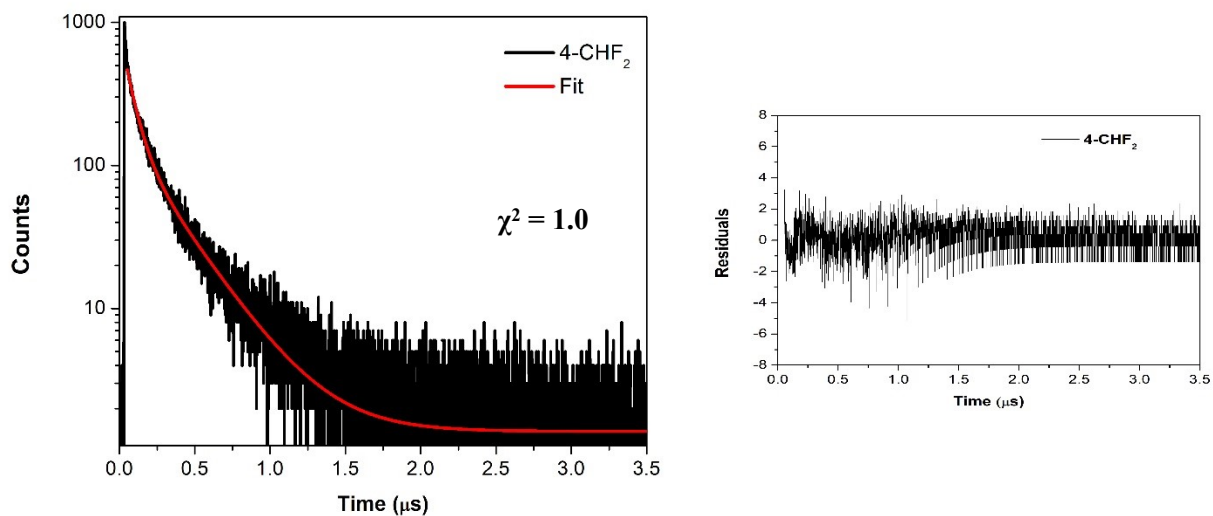

Figure S61. Phosphorescence lifetime and residuals of **4-CHF<sub>2</sub>** in solid state.

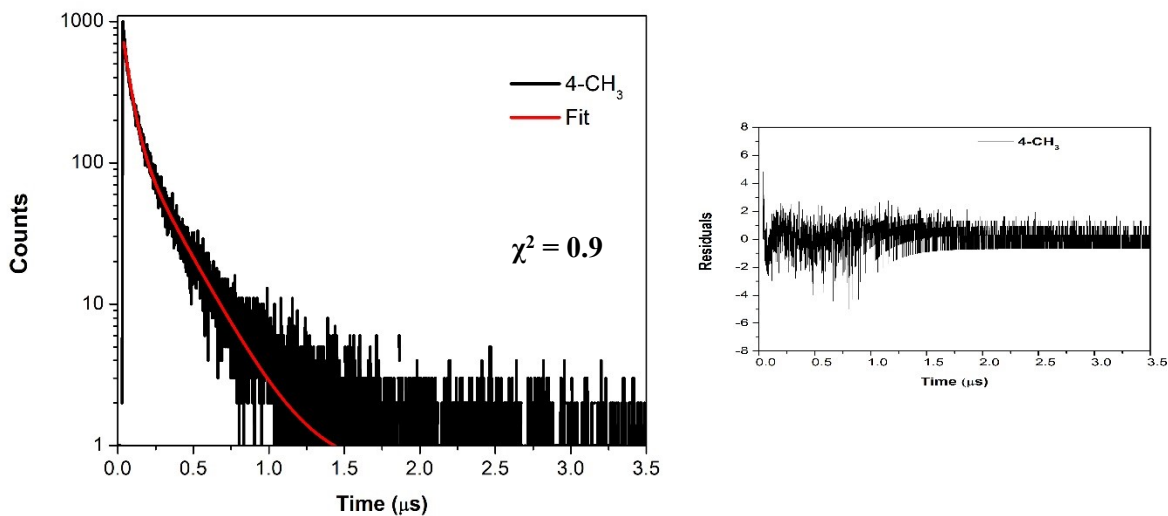

**Figure S62.** Phosphorescence lifetime and residuals of 4-CH<sub>3</sub> in solid state.

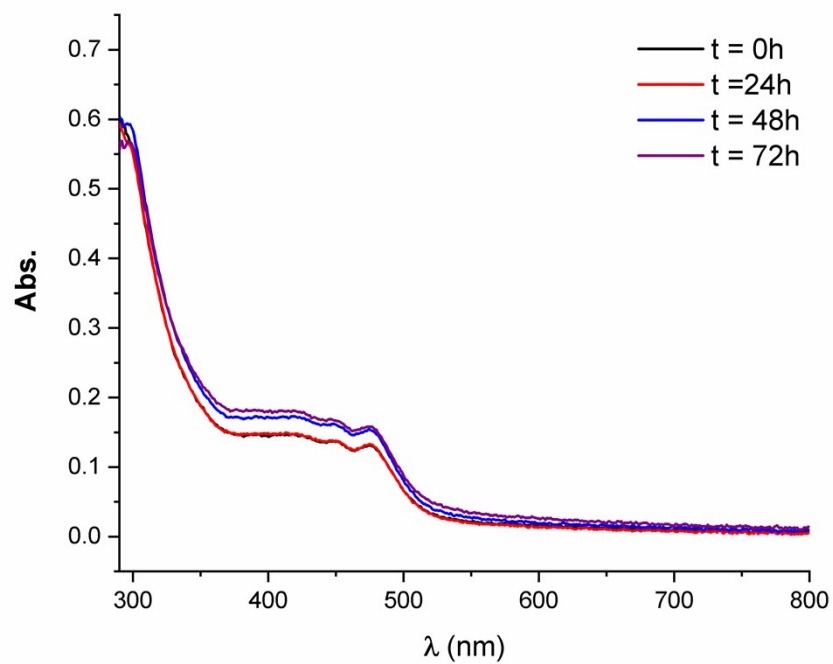

**Figure S63.** Stability of 1-CHF<sub>2</sub> in PBS and DMSO (5%) at 37 °C measured by UV-Vis.

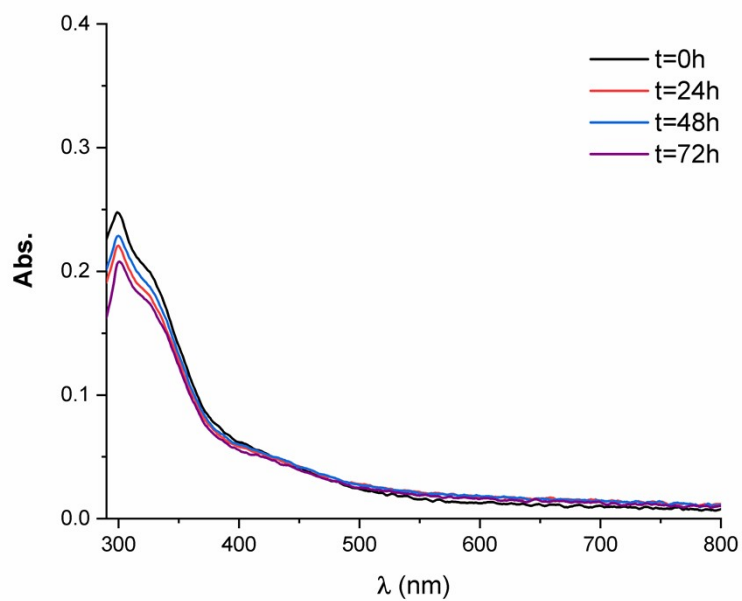

**Figure S64.** Stability of 1-CH<sub>3</sub> in PBS and DMSO (5%) at 37 °C measured by UV-Vis.

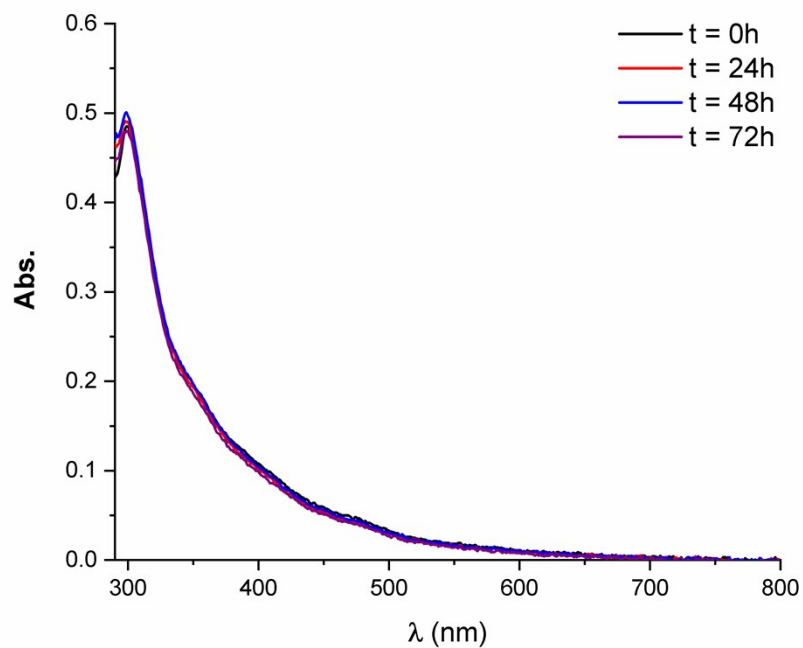

**Figure S65.** Stability of 2-CH<sub>3</sub> in PBS and DMSO (5%) at 37 °C measured by UV-Vis.

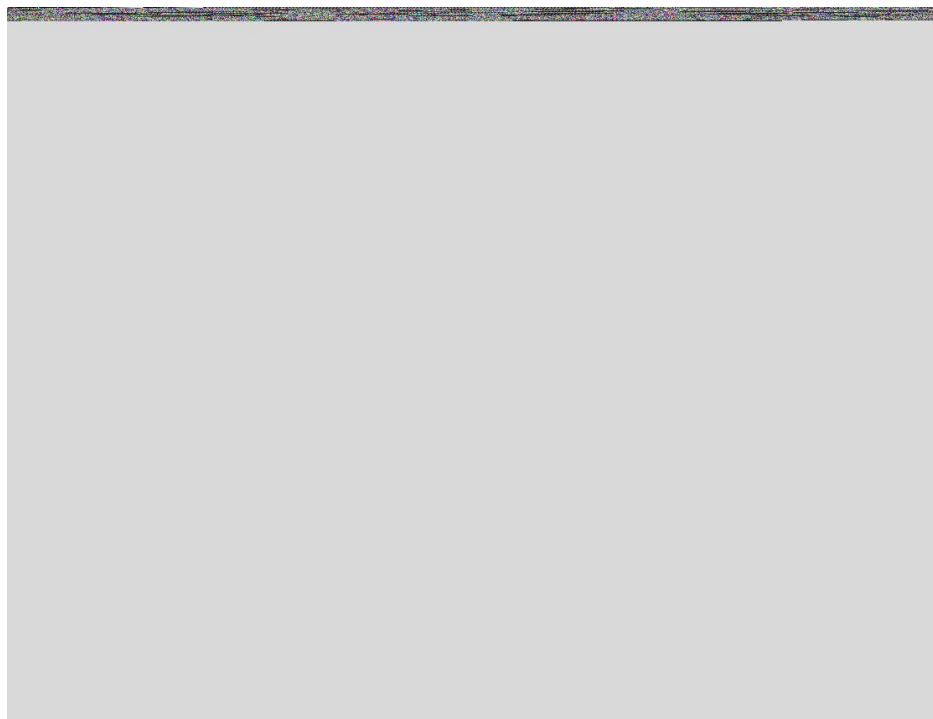

**Figure S66.** Stability of **3-CF<sub>3</sub>** in PBS and DMSO (5%) at 37 °C measured by UV-Vis.

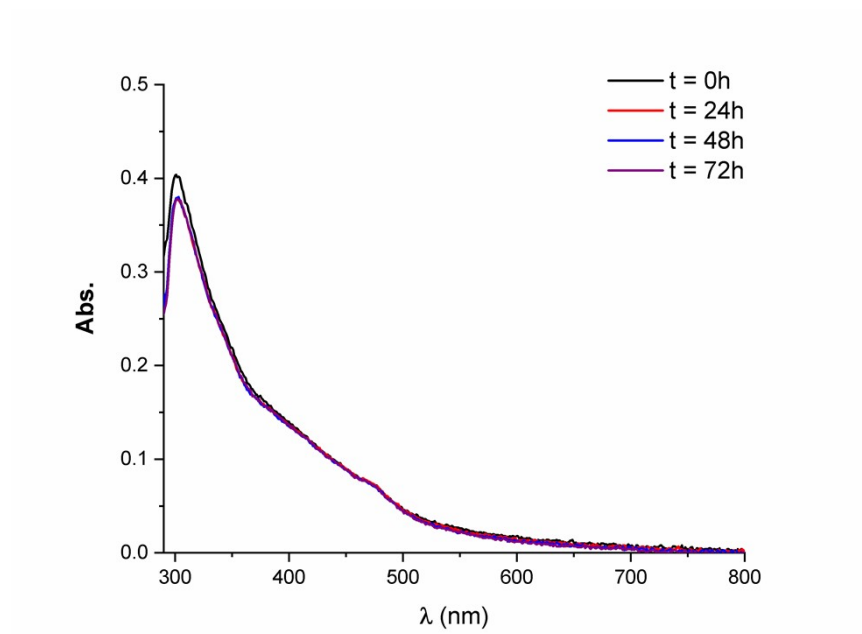

**Figure S67.** Stability of **3-CH<sub>3</sub>** in PBS and DMSO (5%) at 37 °C measured by UV-Vis.

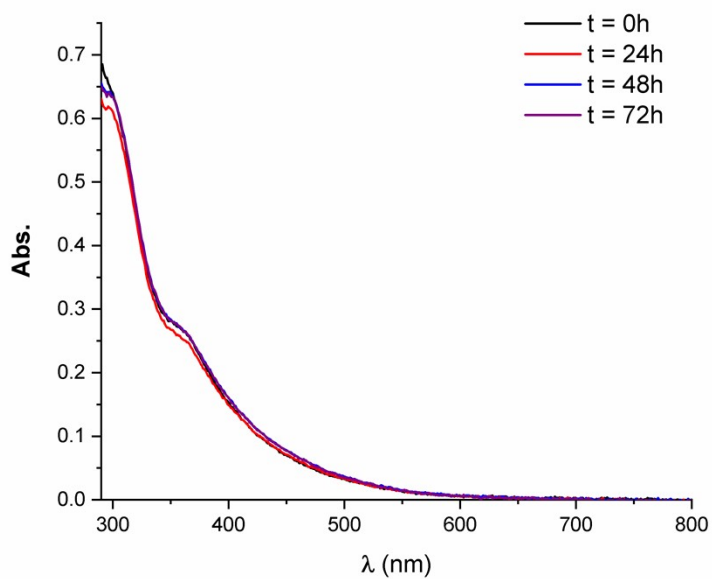

**Figure S68.** Stability of 4-CF<sub>3</sub> in PBS and DMSO (5%) at 37 °C measured by UV-Vis.

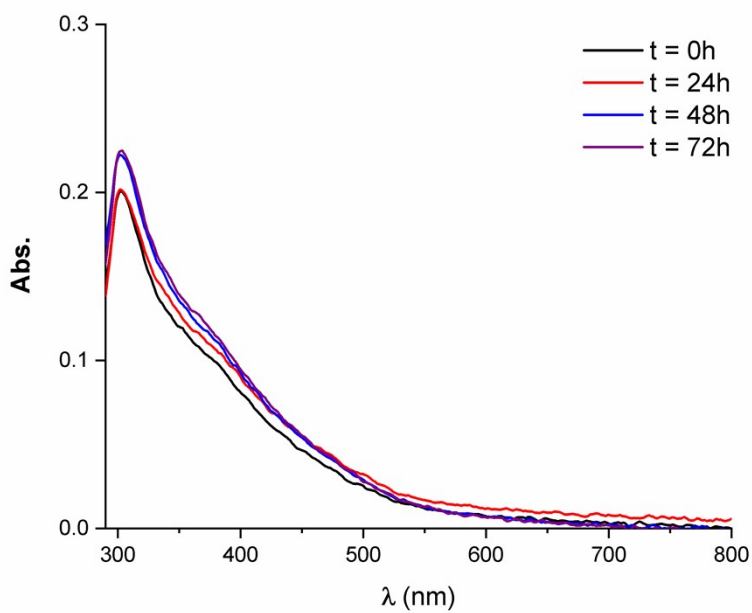

**Figure S69.** Stability of 4-CH<sub>3</sub> in PBS and DMSO (5%) at 37 °C measured by UV-Vis.
